# Supplementary material for: Regio- and stereoselective synthesis of tetrasubstituted (E)-(2-chloro-2-fluoro-1-iodovinyl)dimethylphenylsilane and its desilylative sonogashira coupling
Source: Royal Society of Chemistry journal article supplement (doi:10.1039/d2ob01827f), 2022-01-01

## Supporting Information

# Regio- and Stereoselective Synthesis of Tetrasubstituted (*E*)-(2-Chloro-2-fluoro-1-iodovinyl)dimethylphenylsilane and its Desilylative Sonogashira Coupling

Rin Tanaka, Keiichi Sato, Masahiro Shiosaki, Takeshi Hanamoto\*<sup>a</sup>

*Department of Chemistry and Applied Chemistry, Saga University,  
Honjyo-machi 1, Saga 840-8502, Japan*

[hanamoto@cc.saga-u.ac.jp](mailto:hanamoto@cc.saga-u.ac.jp)

|                                                                                                    |                 |
|----------------------------------------------------------------------------------------------------|-----------------|
| <b><sup>1</sup>H, <sup>13</sup>C, and <sup>19</sup>F-NMR spectra for compound 2a, 2b, 5ba-5bi:</b> | <b>S2 – S34</b> |
| <b>GC-MS of 1b</b>                                                                                 | <b>S35</b>      |

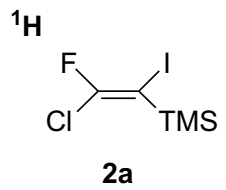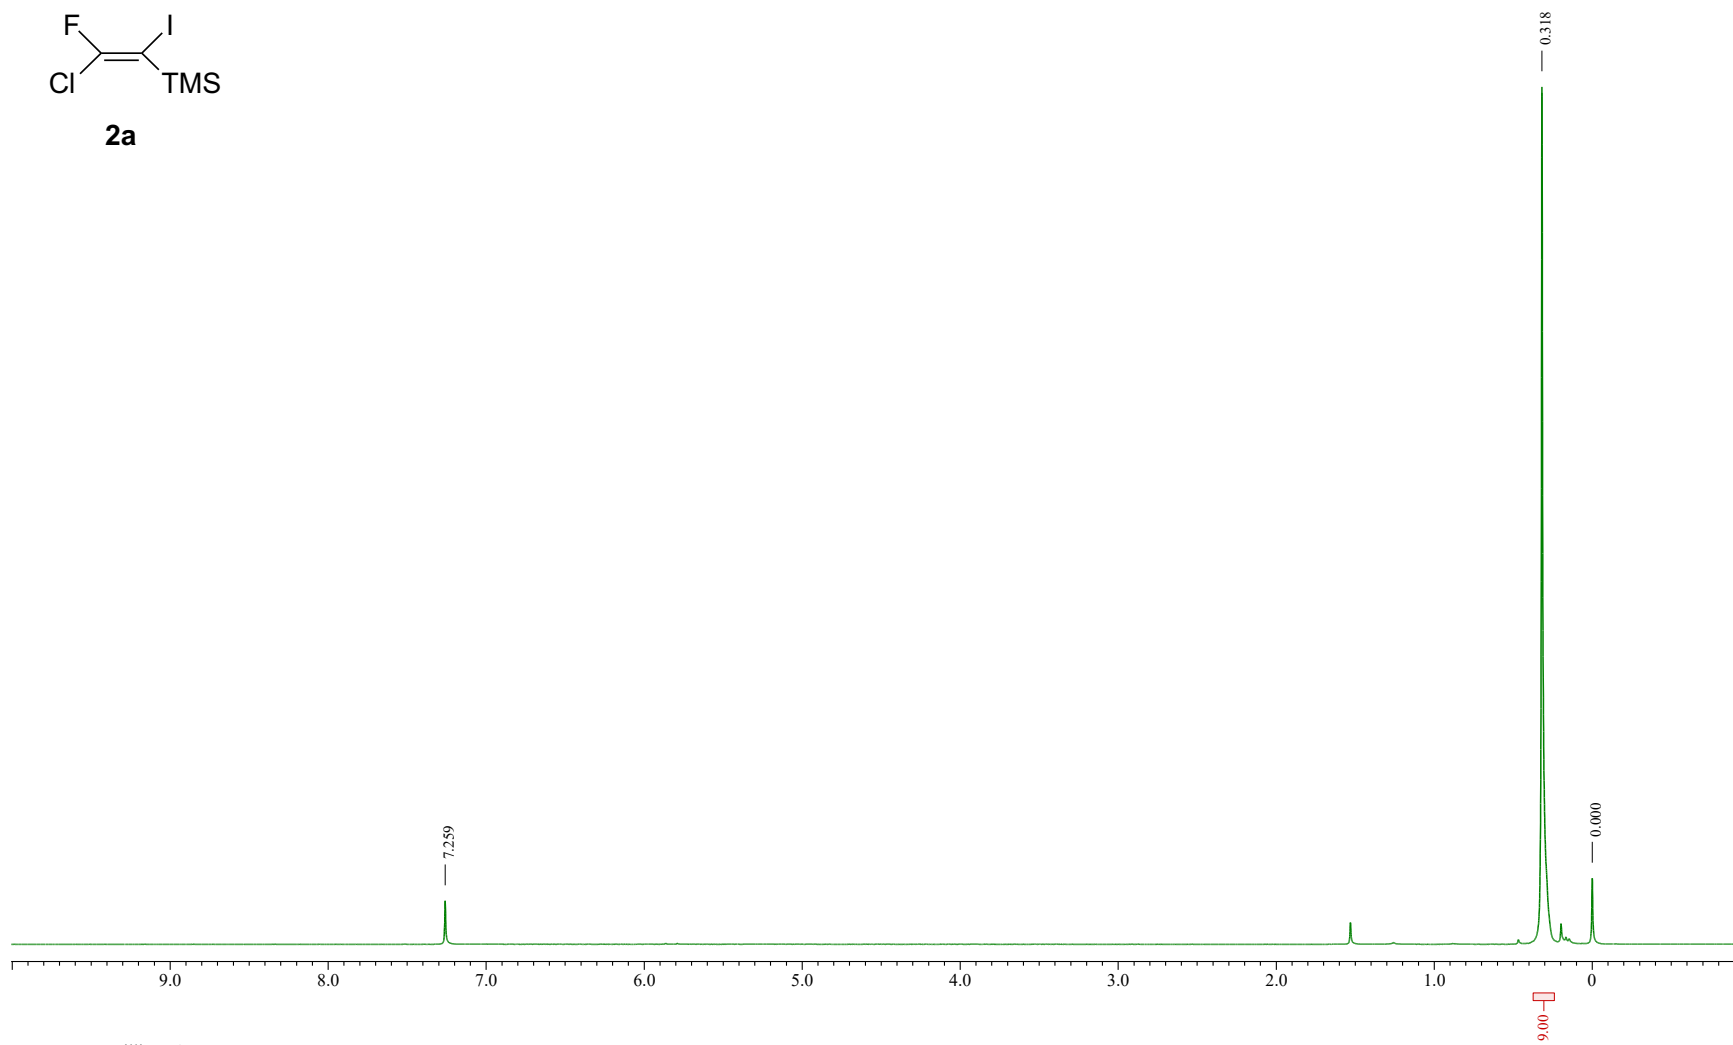

<sup>13</sup>C

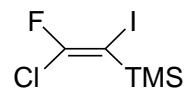

2a

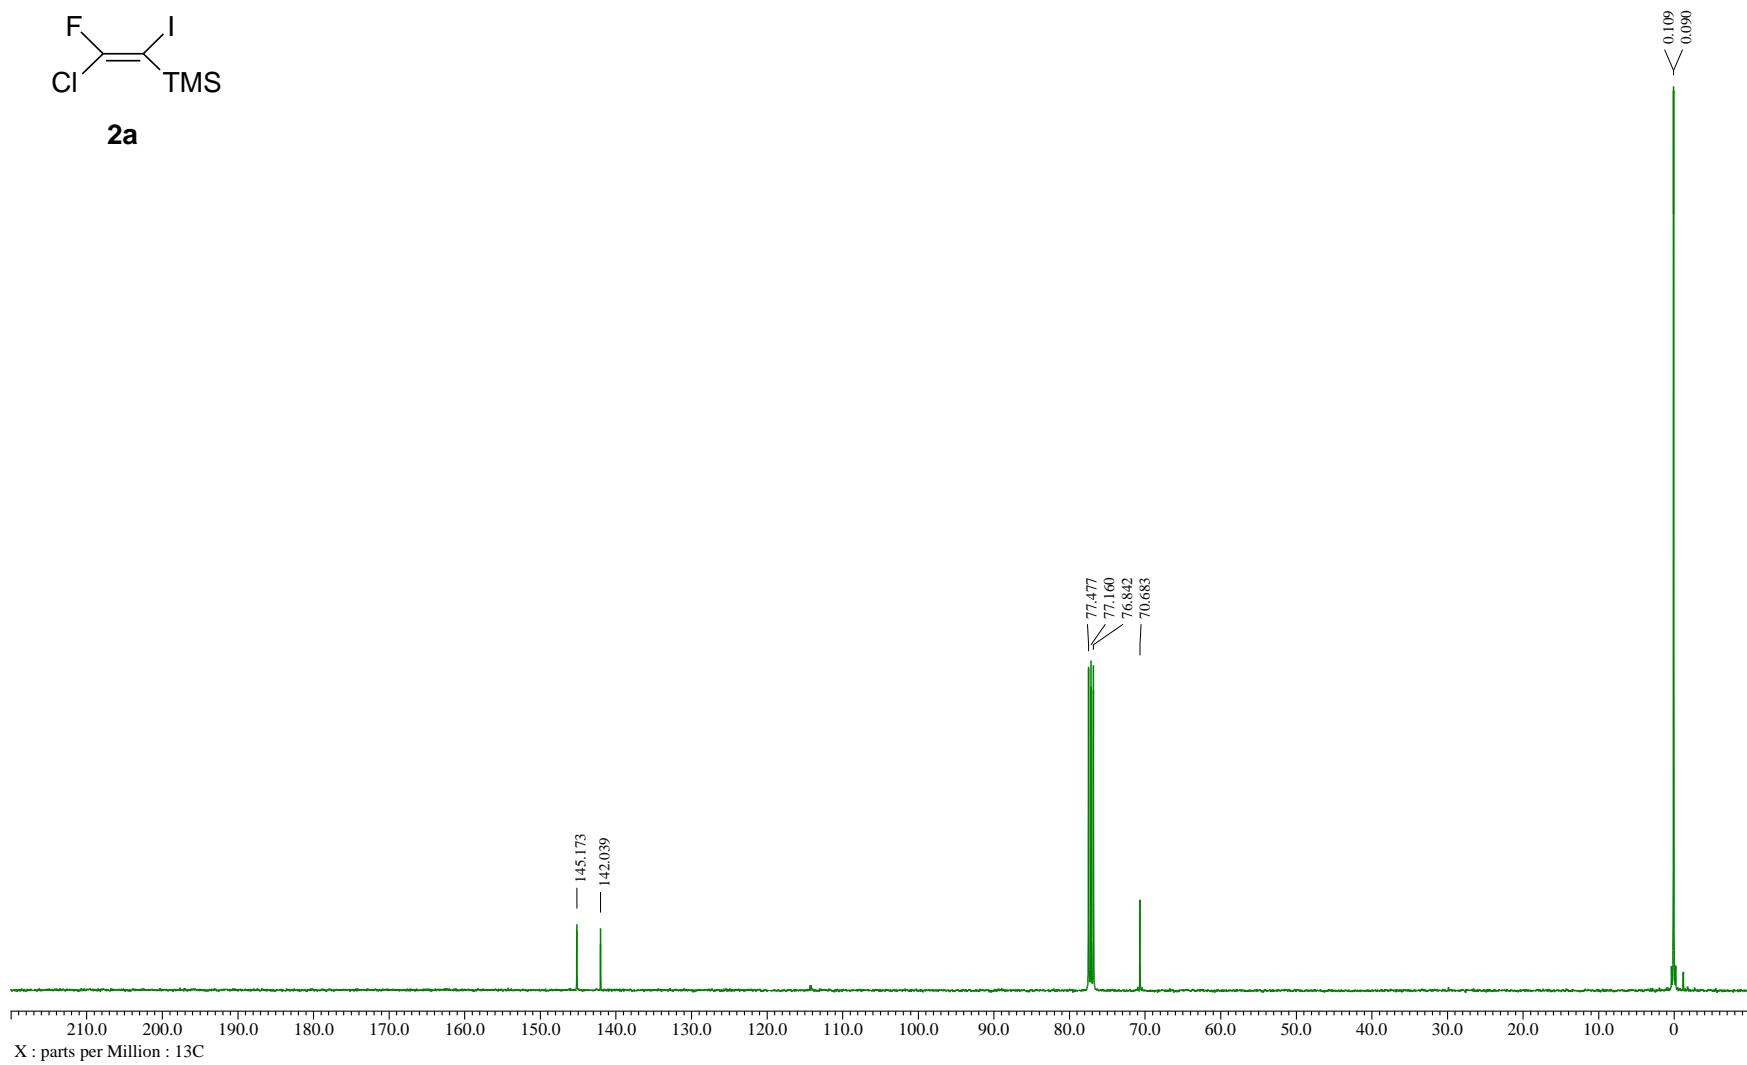

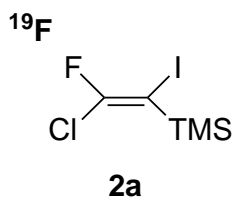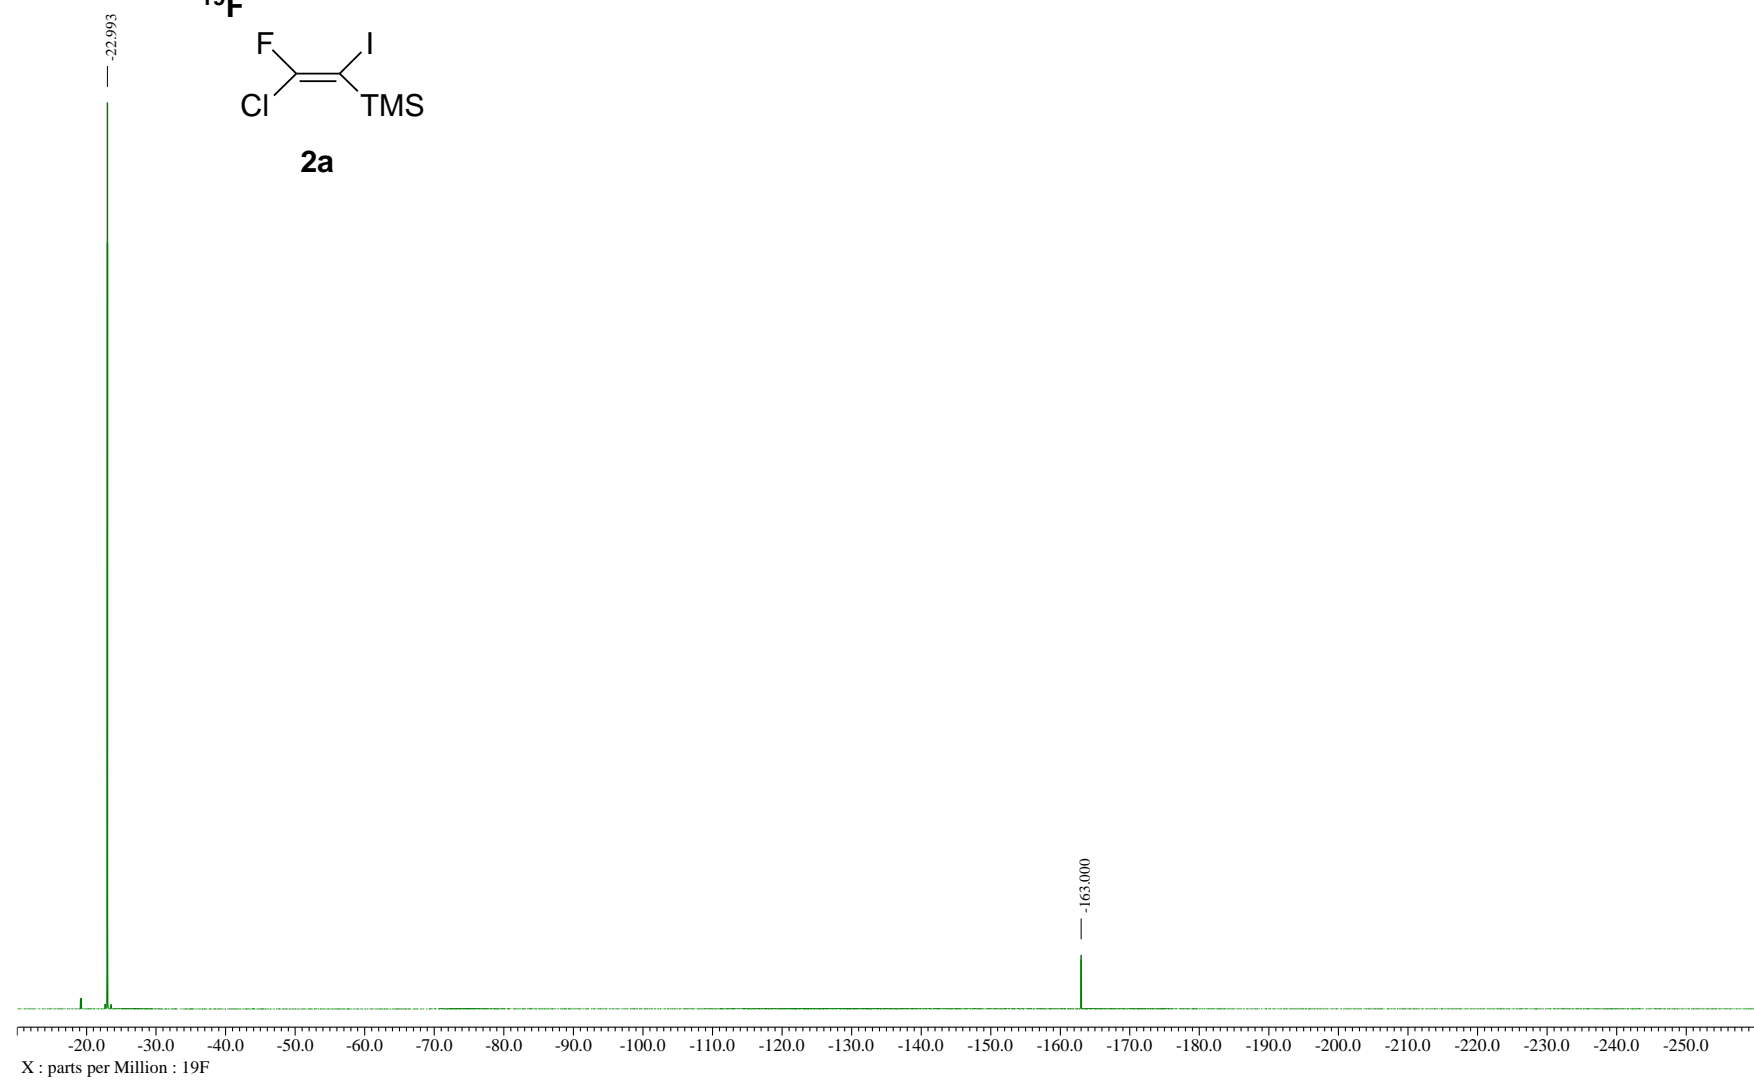

<sup>1</sup>H

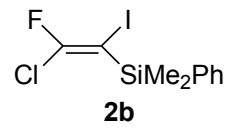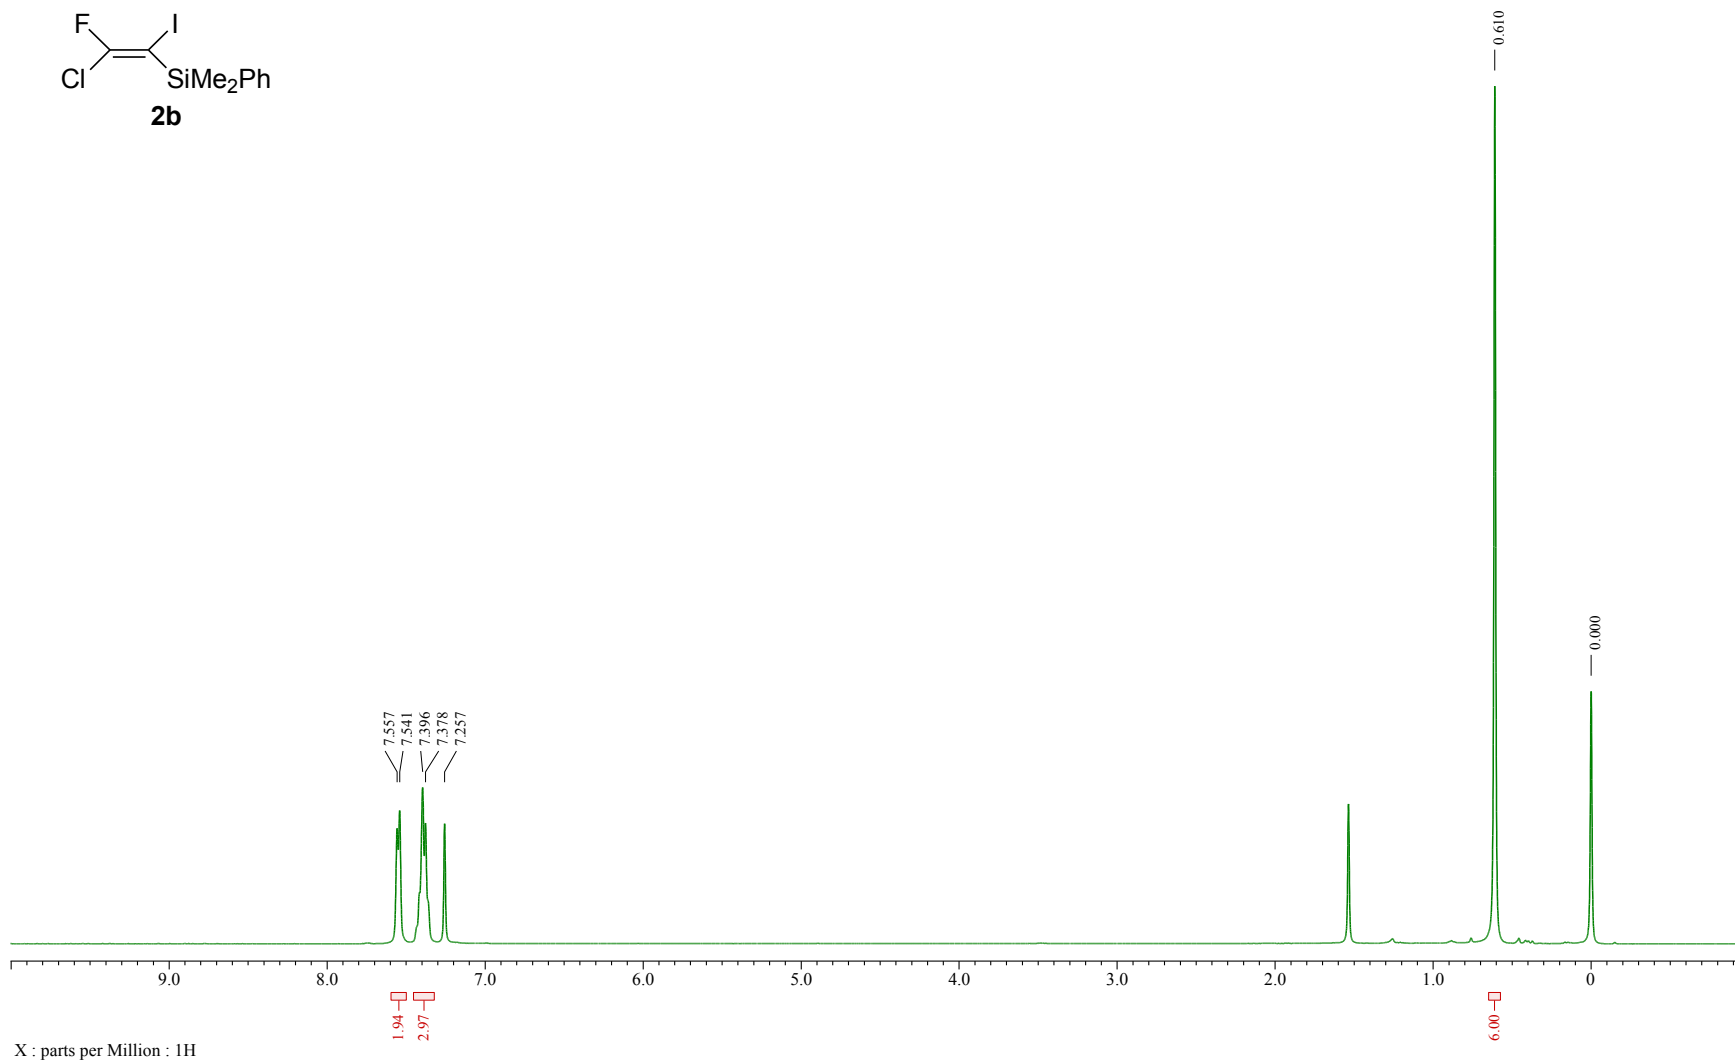

<sup>13</sup>C

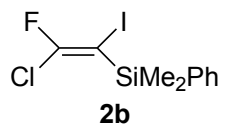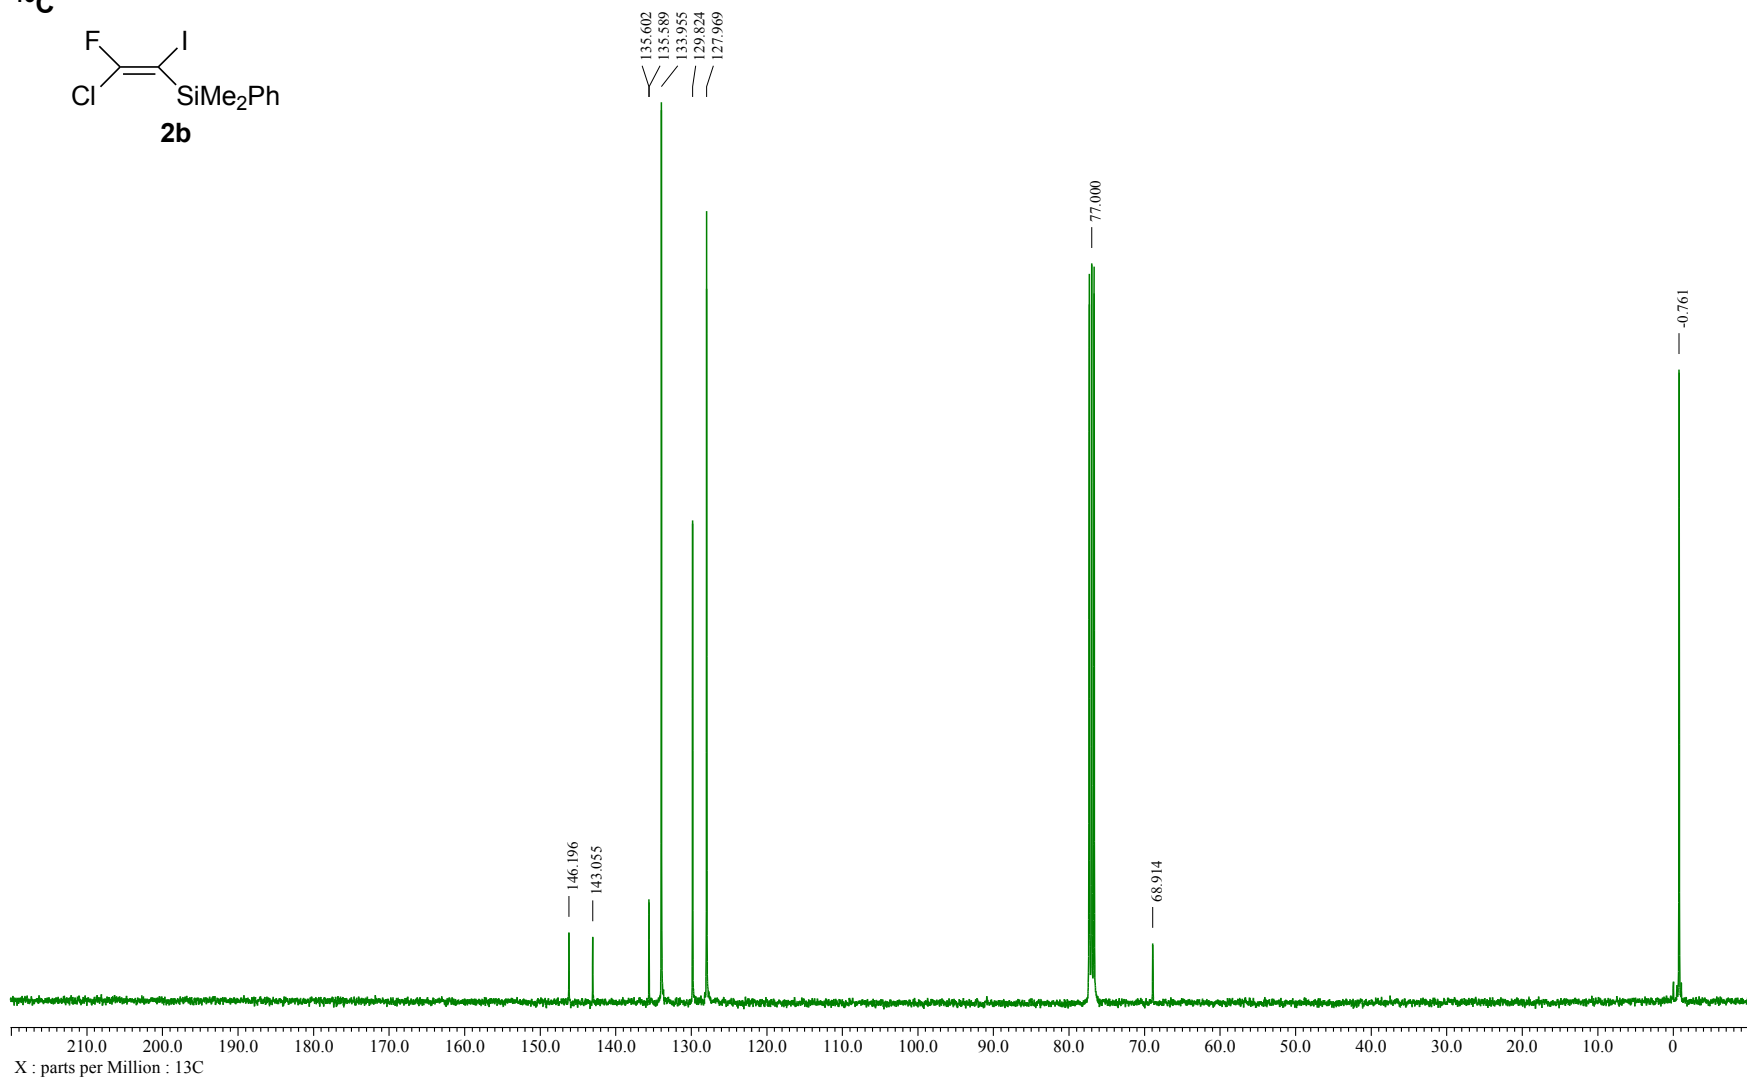

<sup>19</sup>F

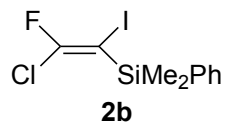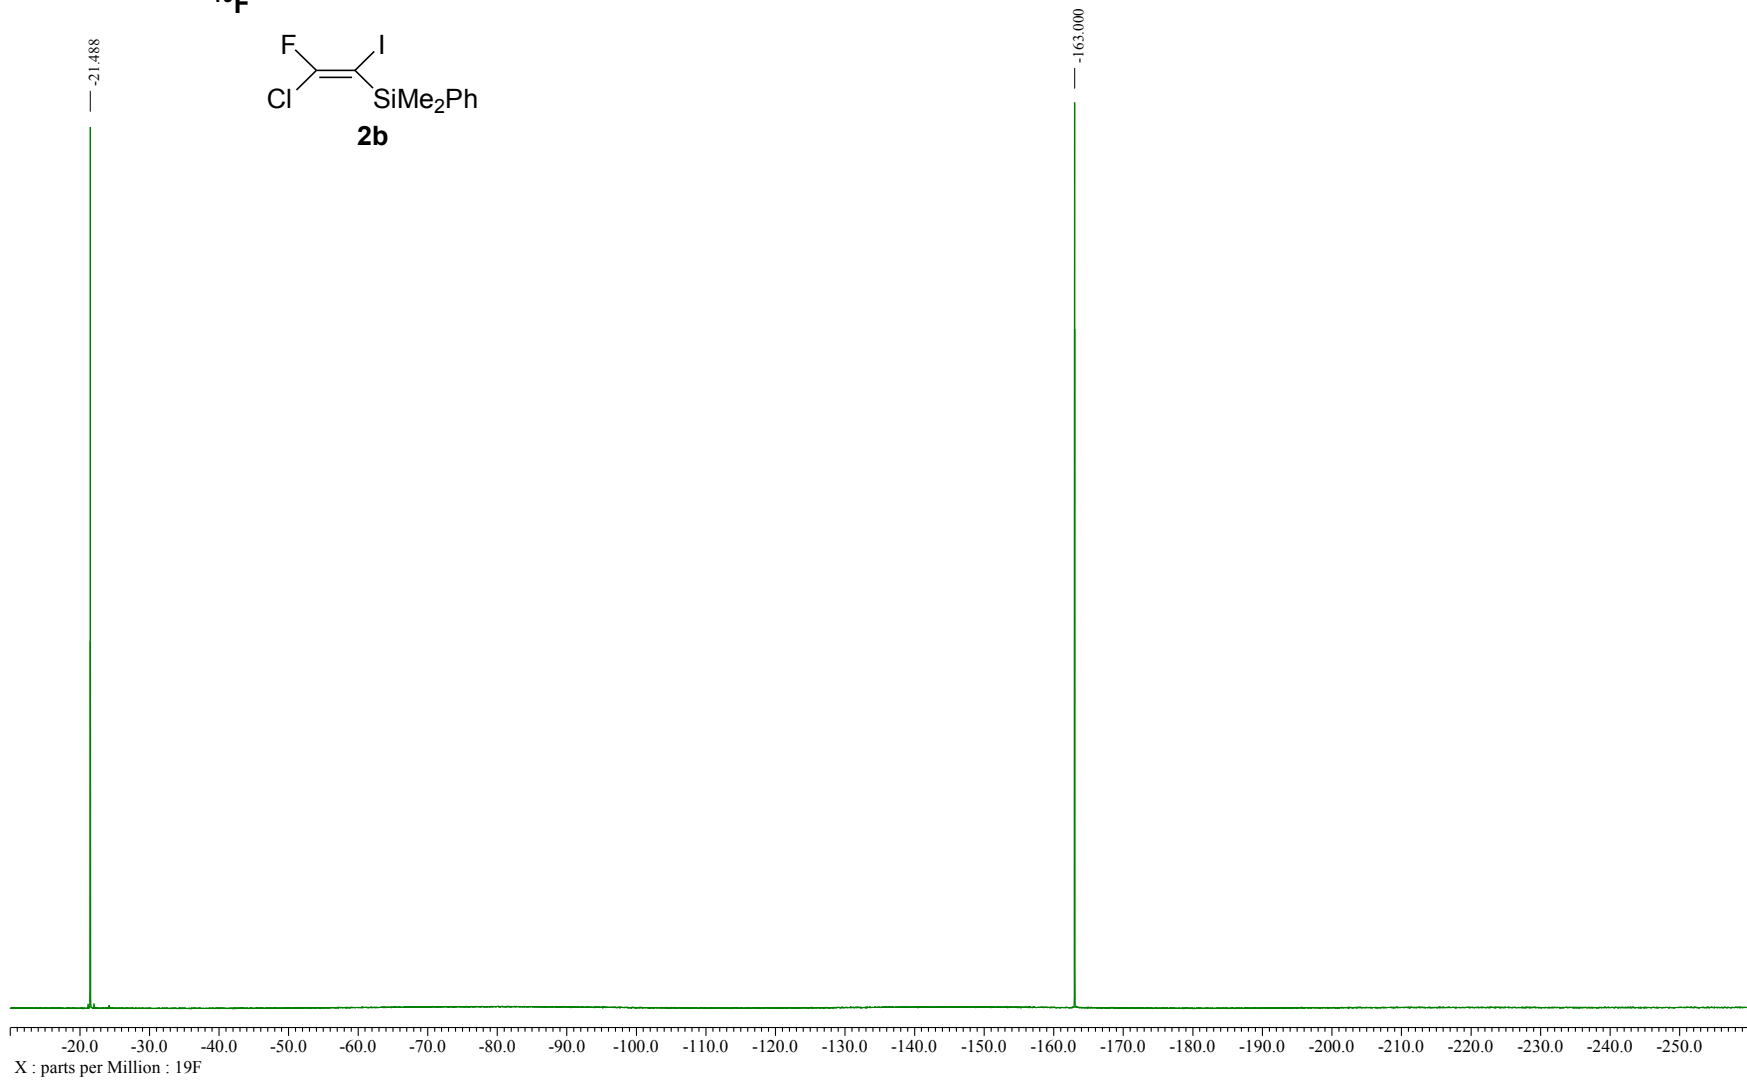

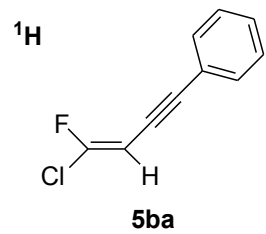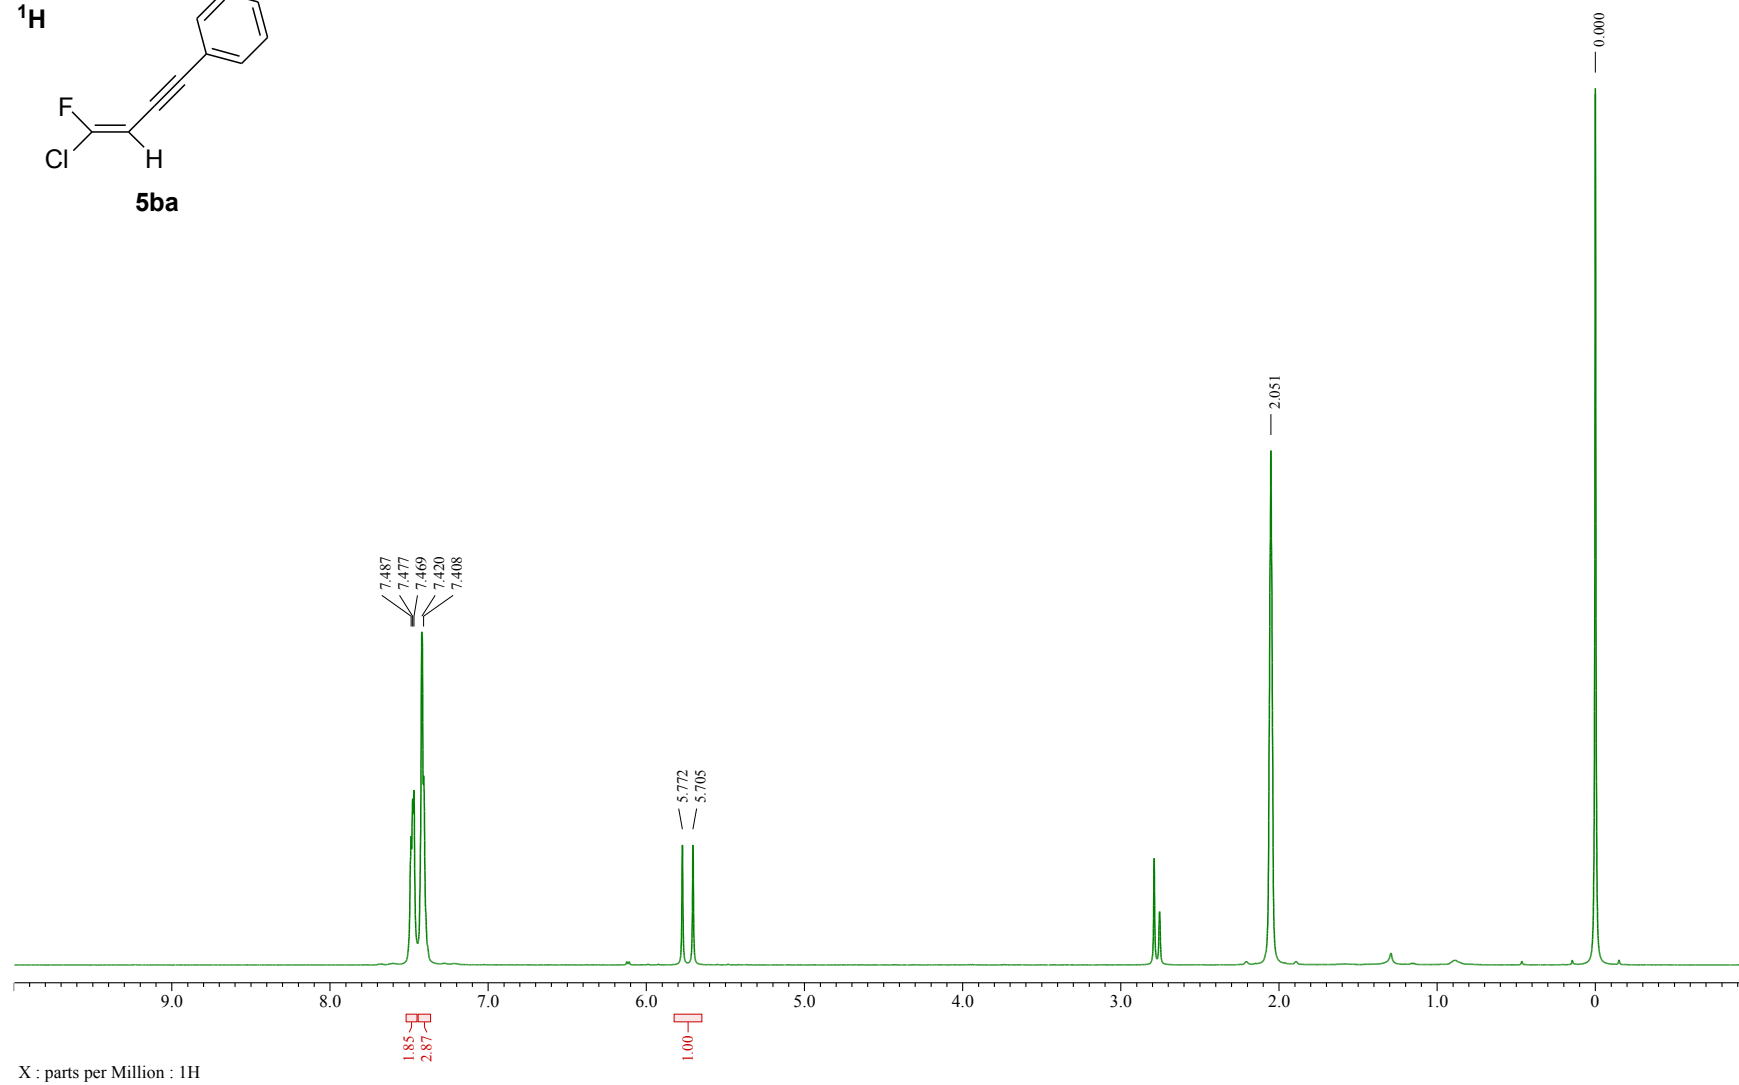



<sup>13</sup>C

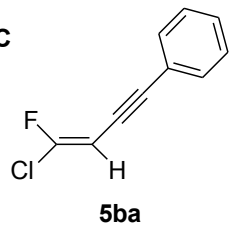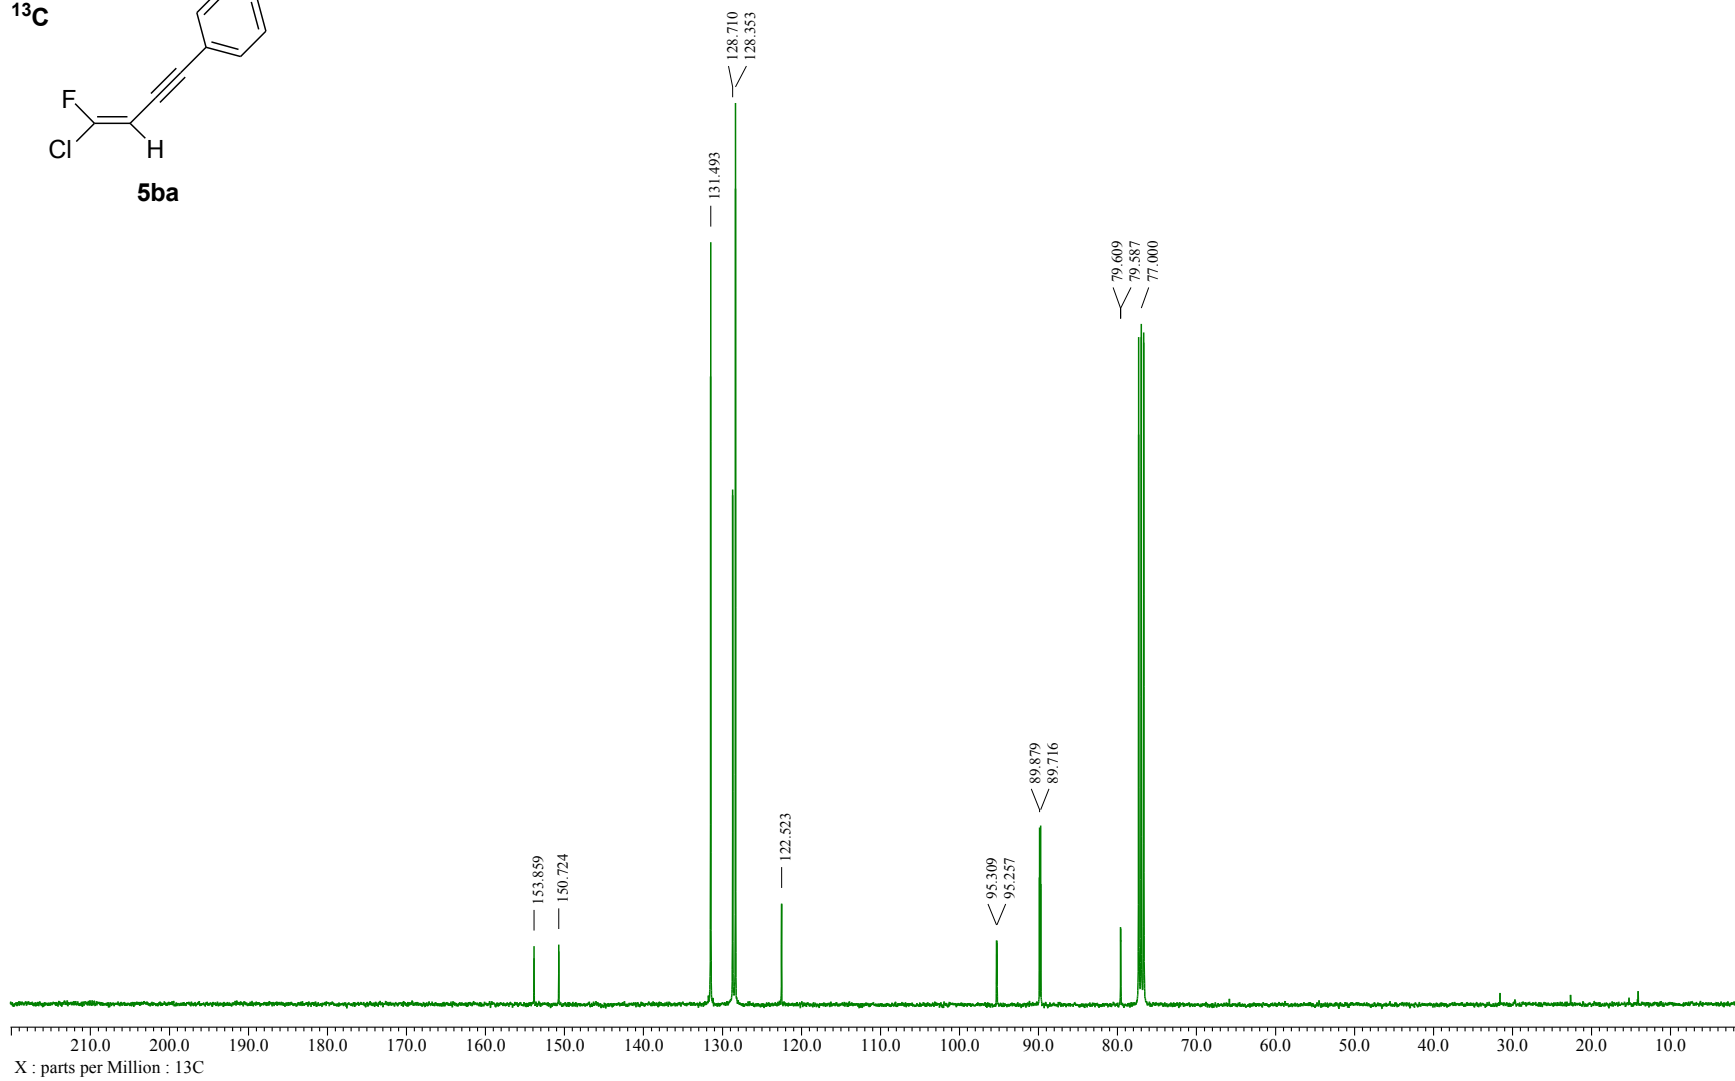

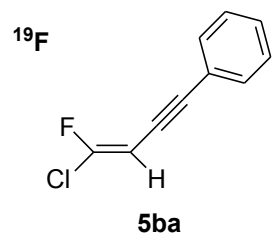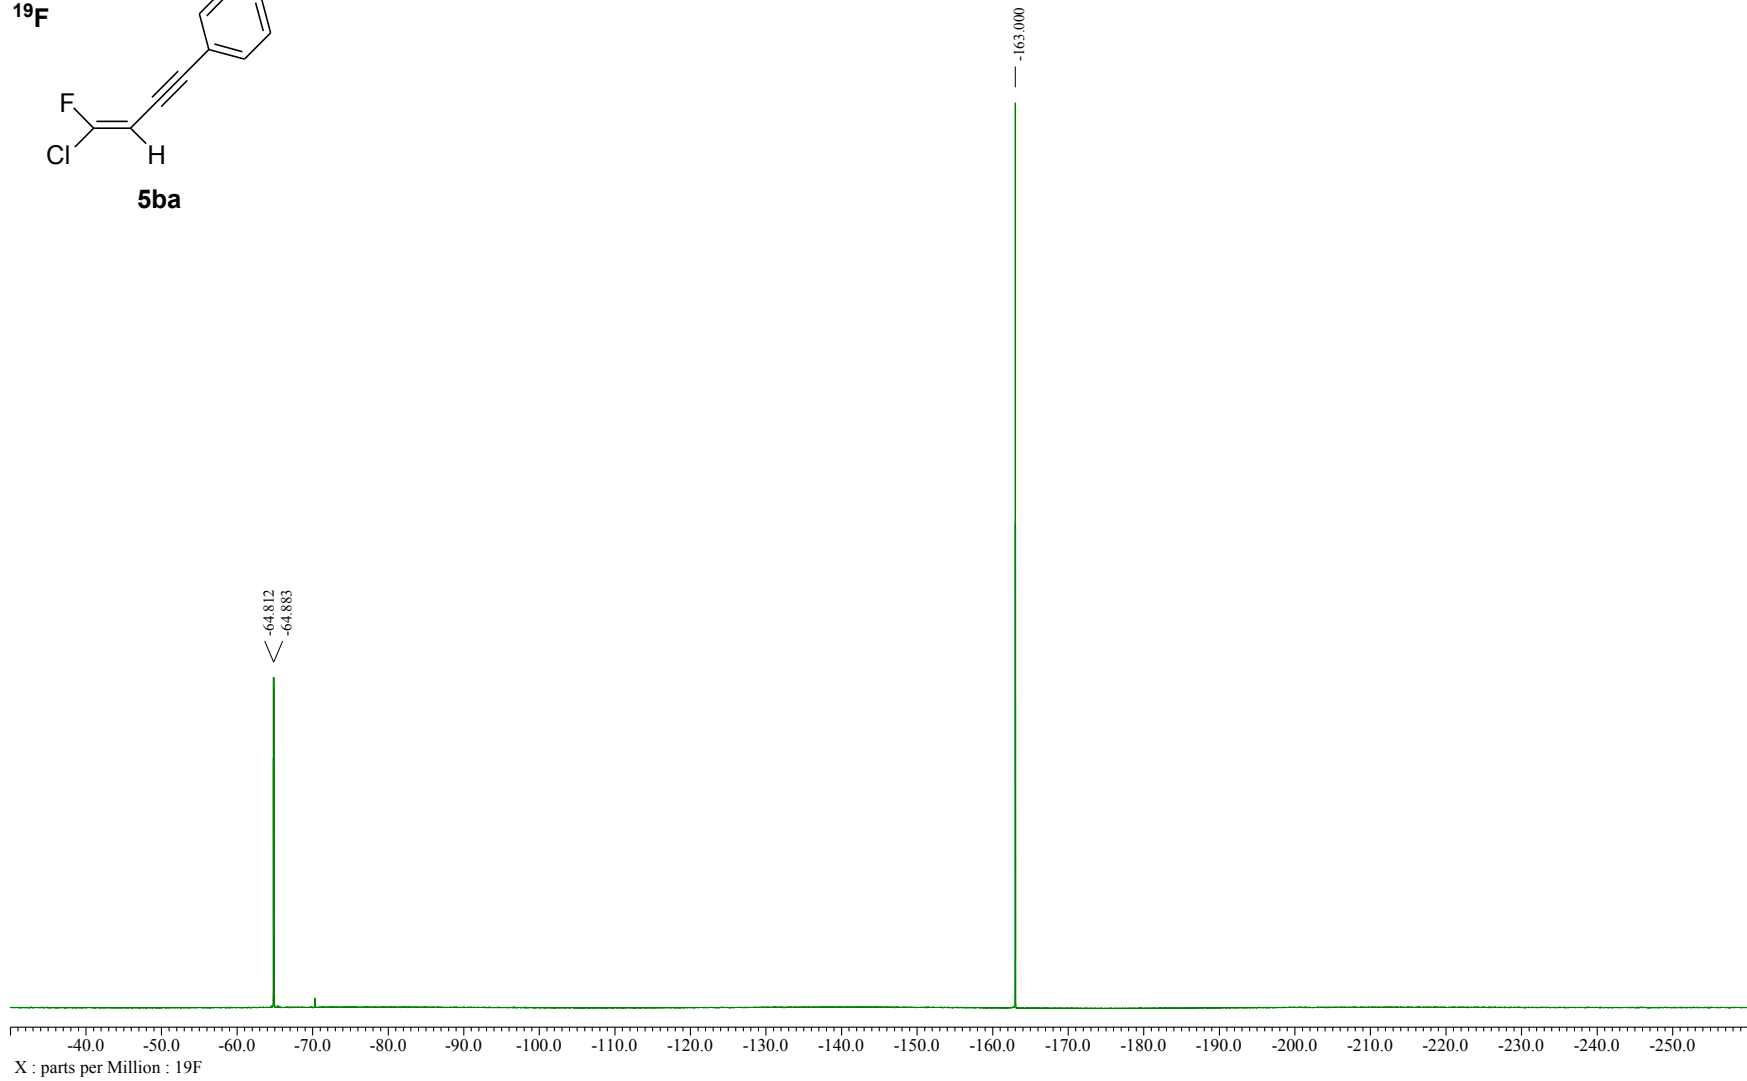

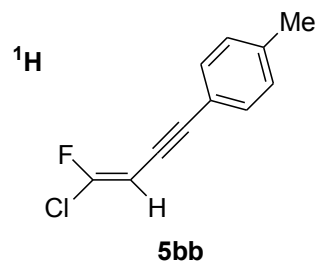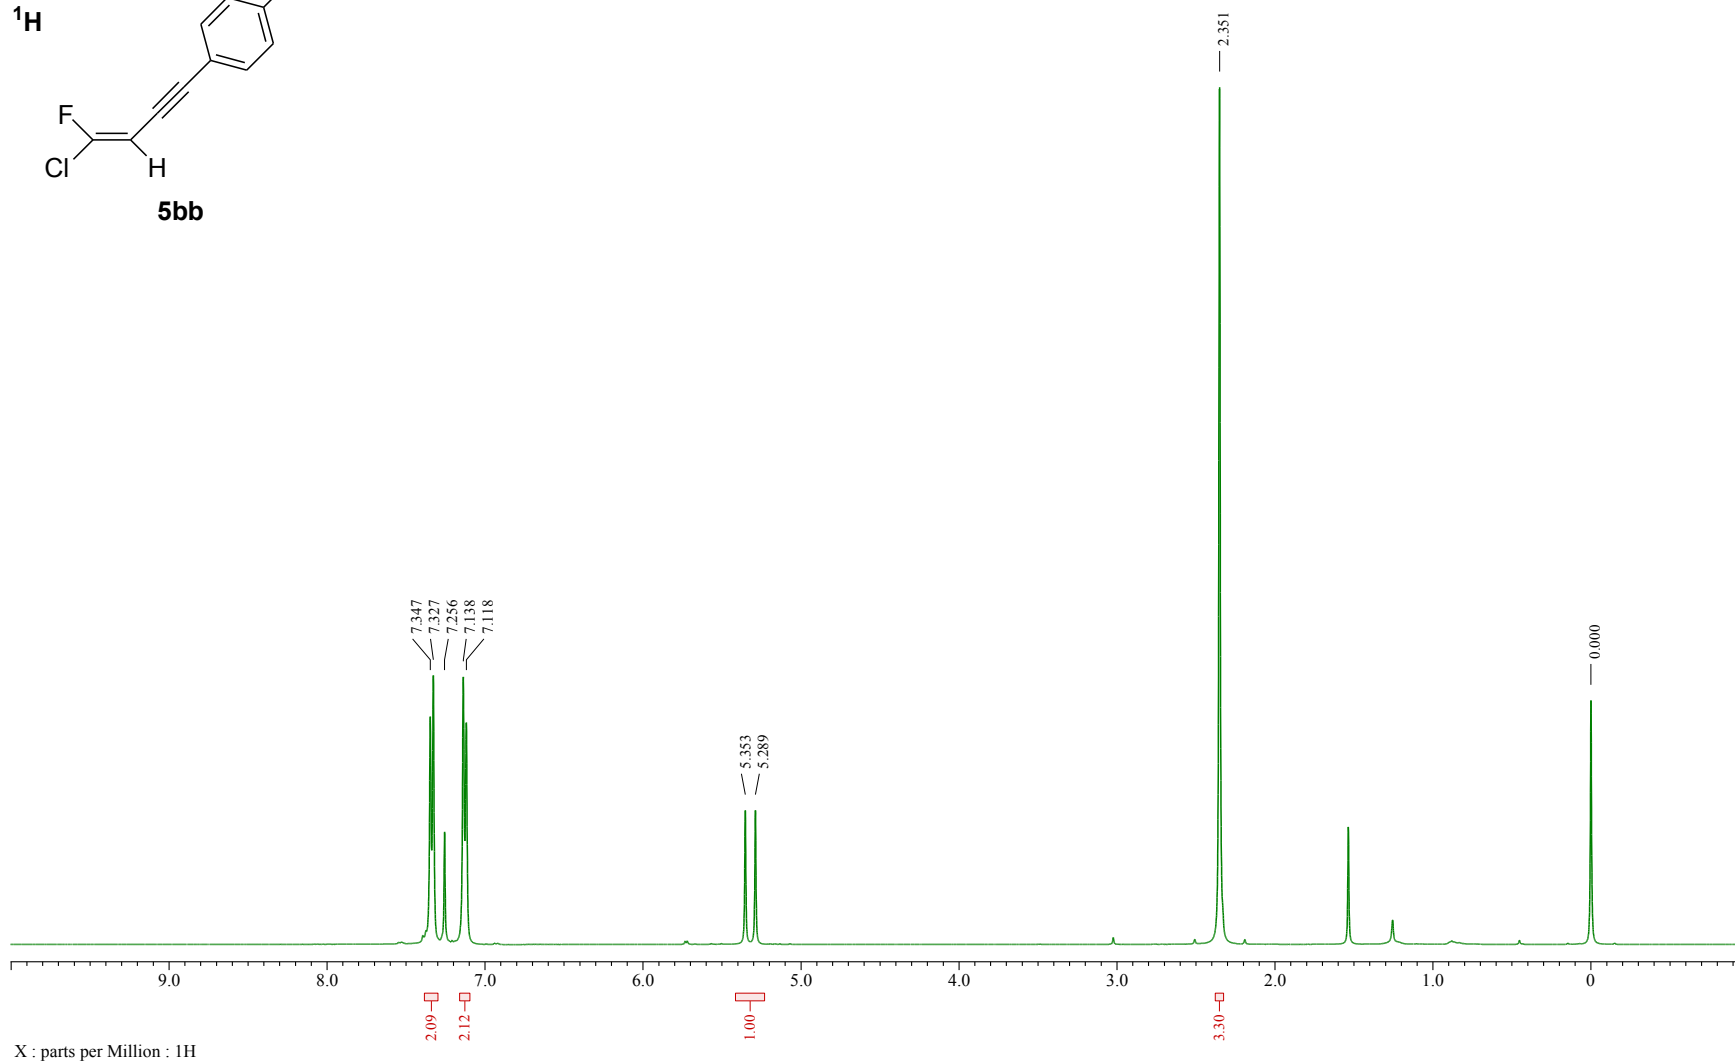

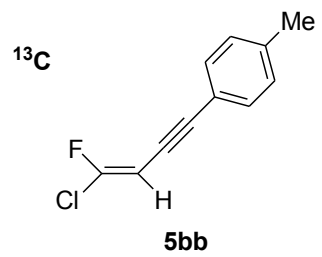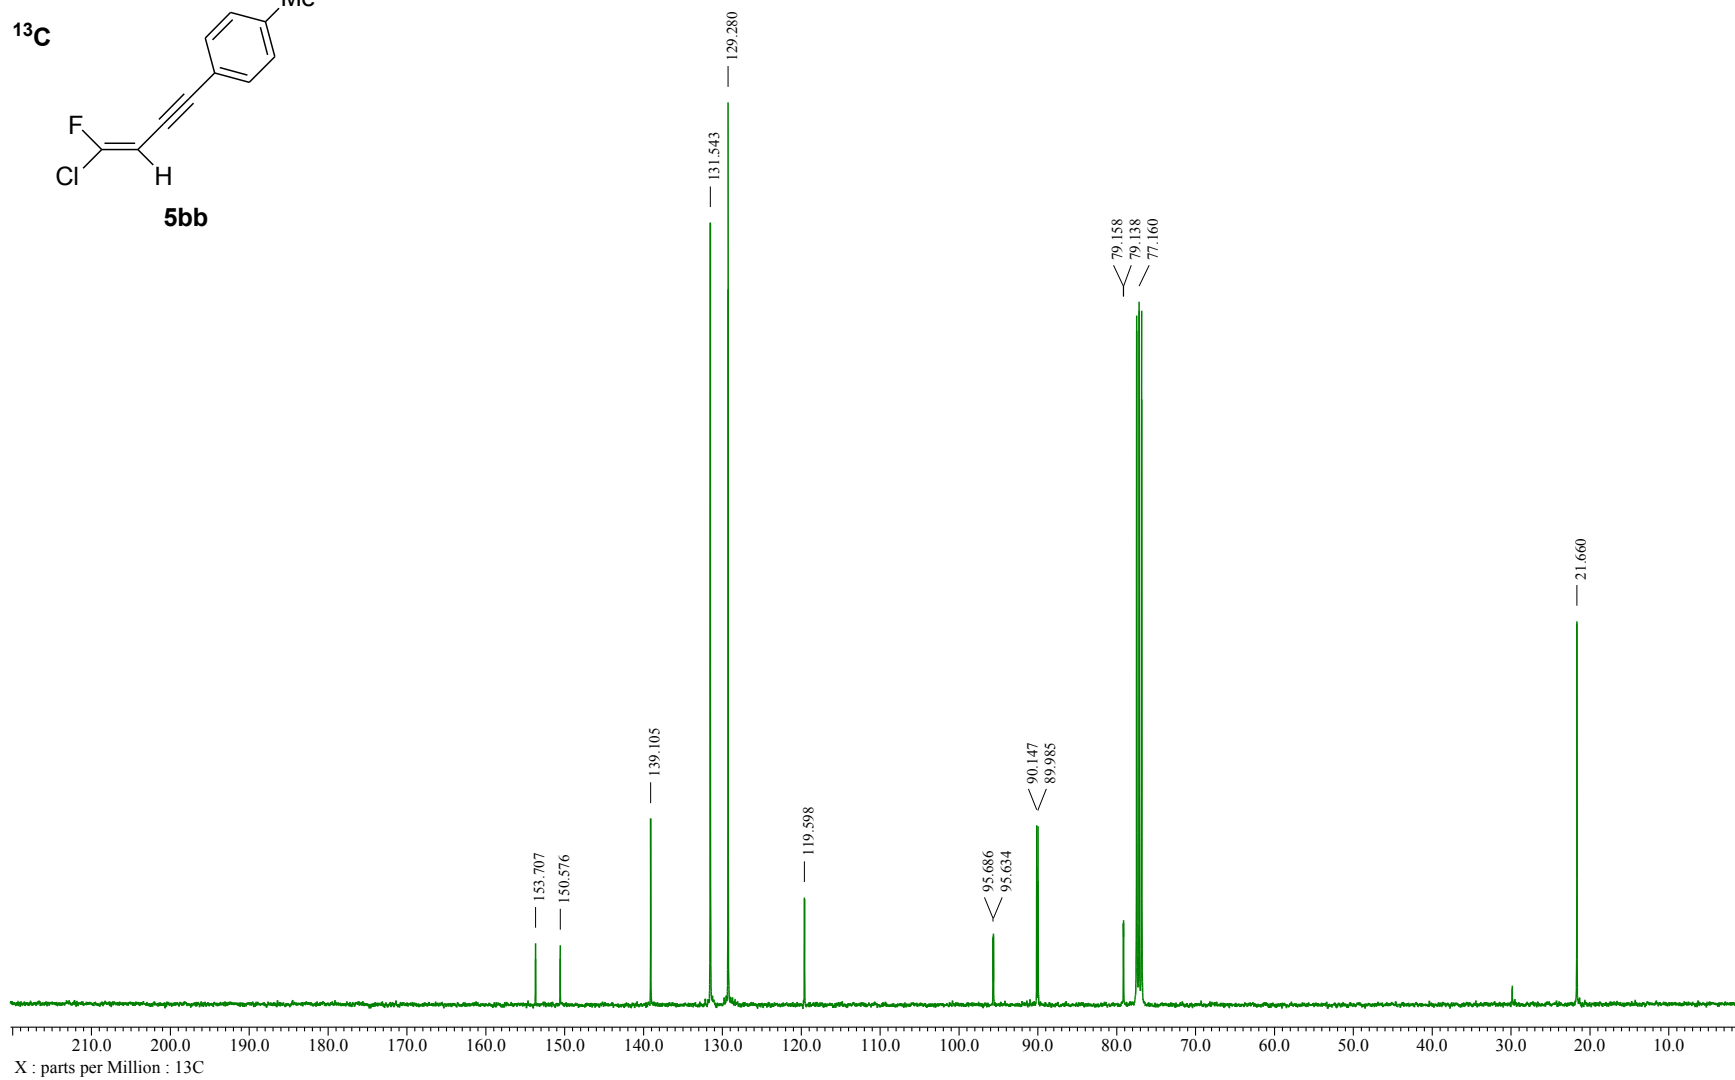

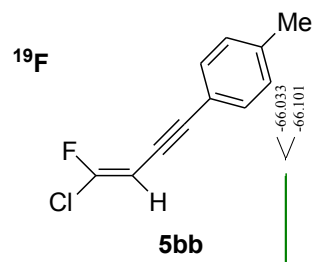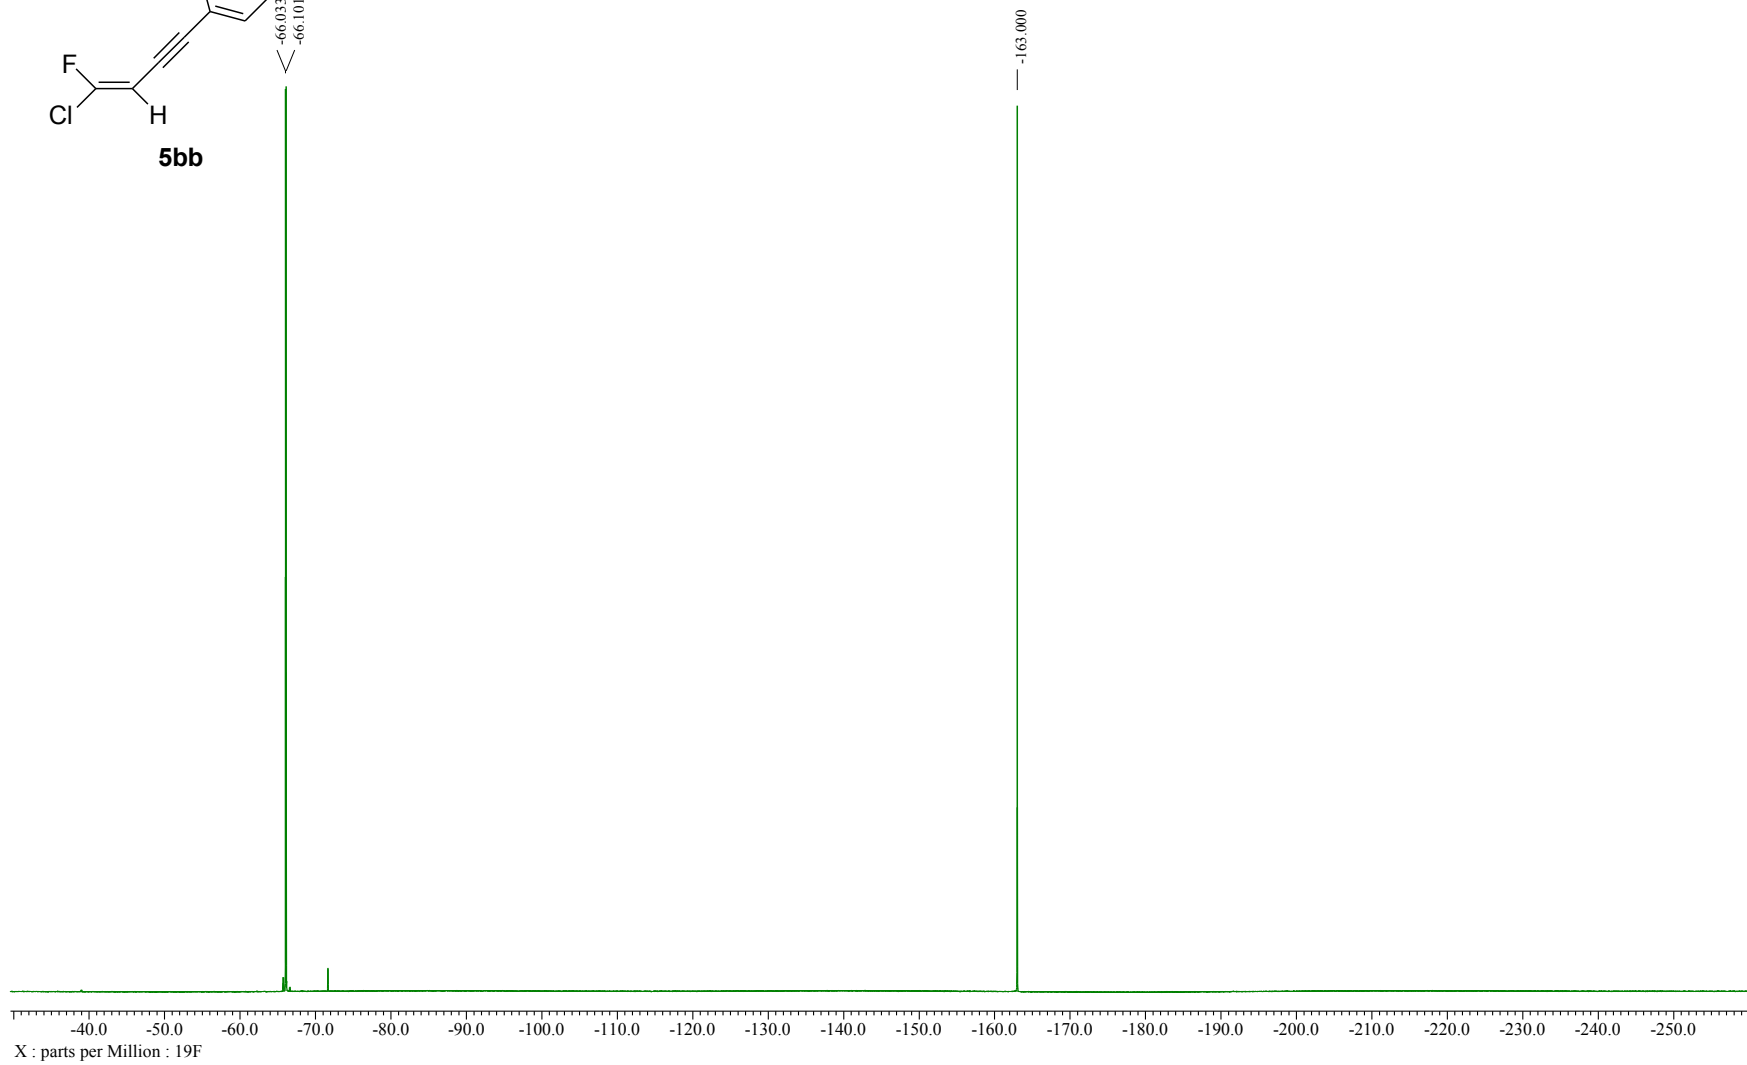

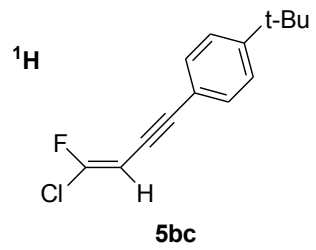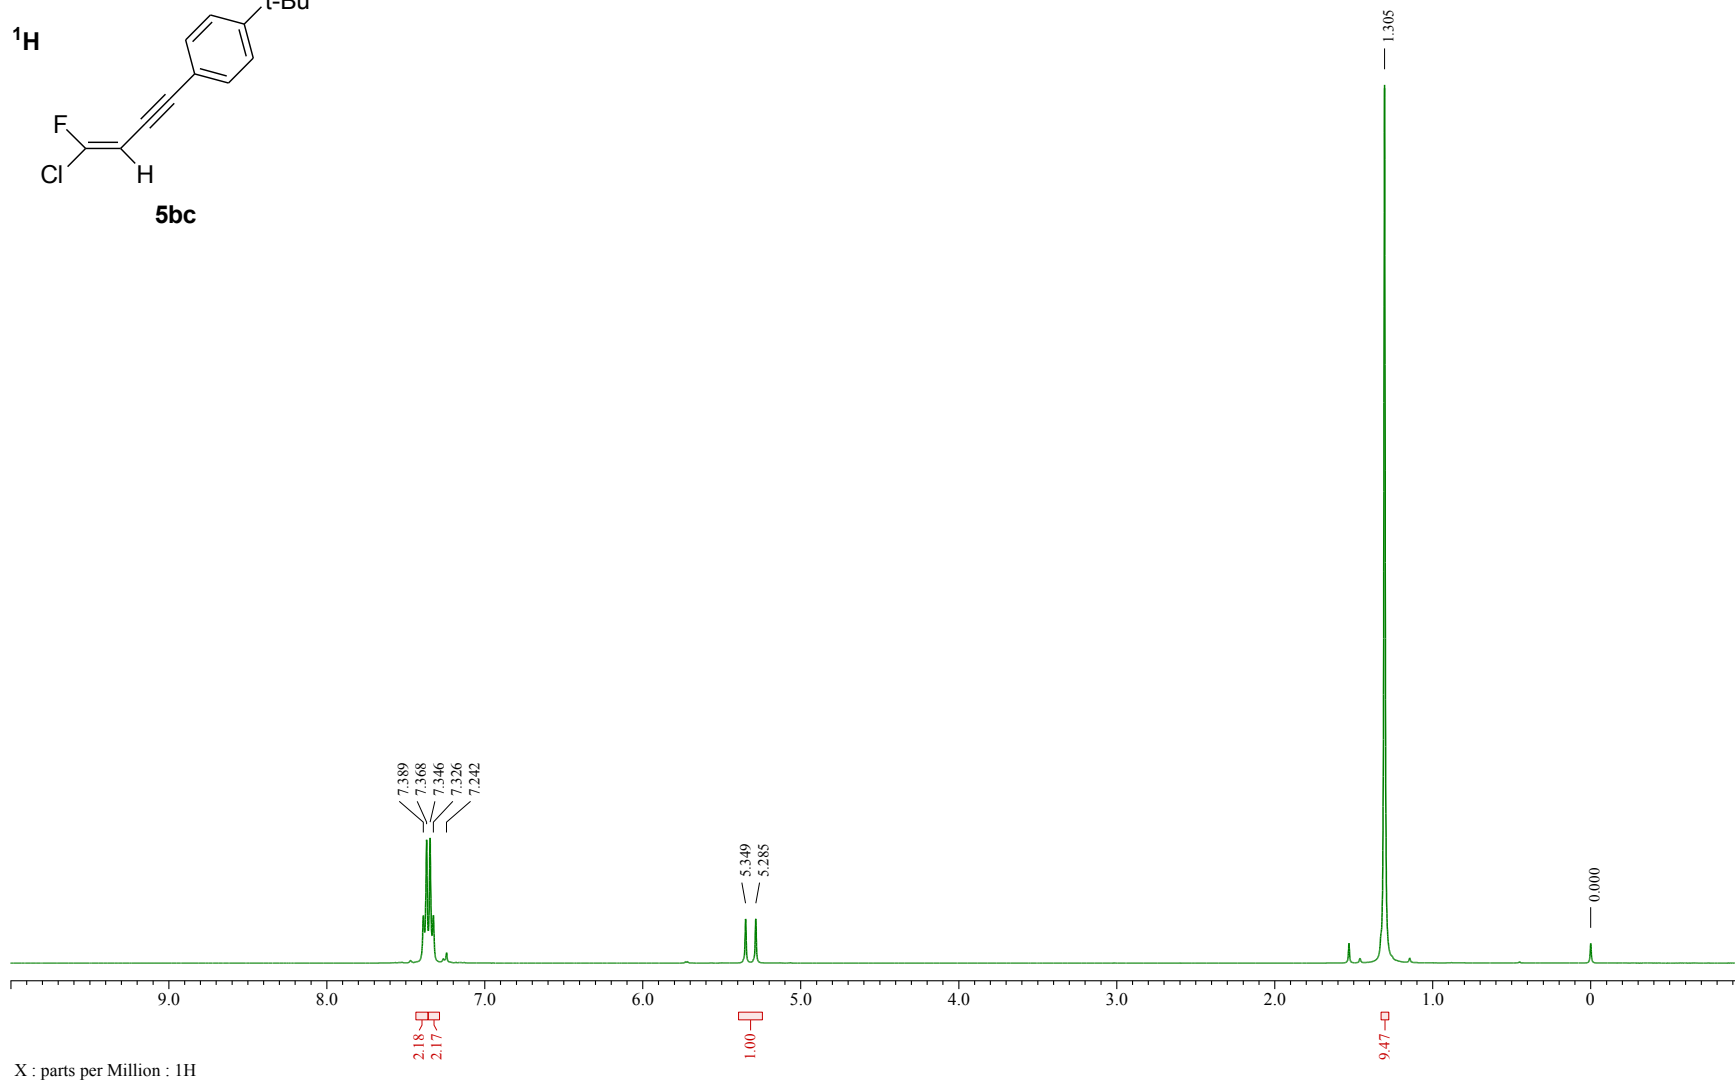

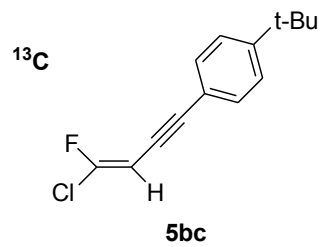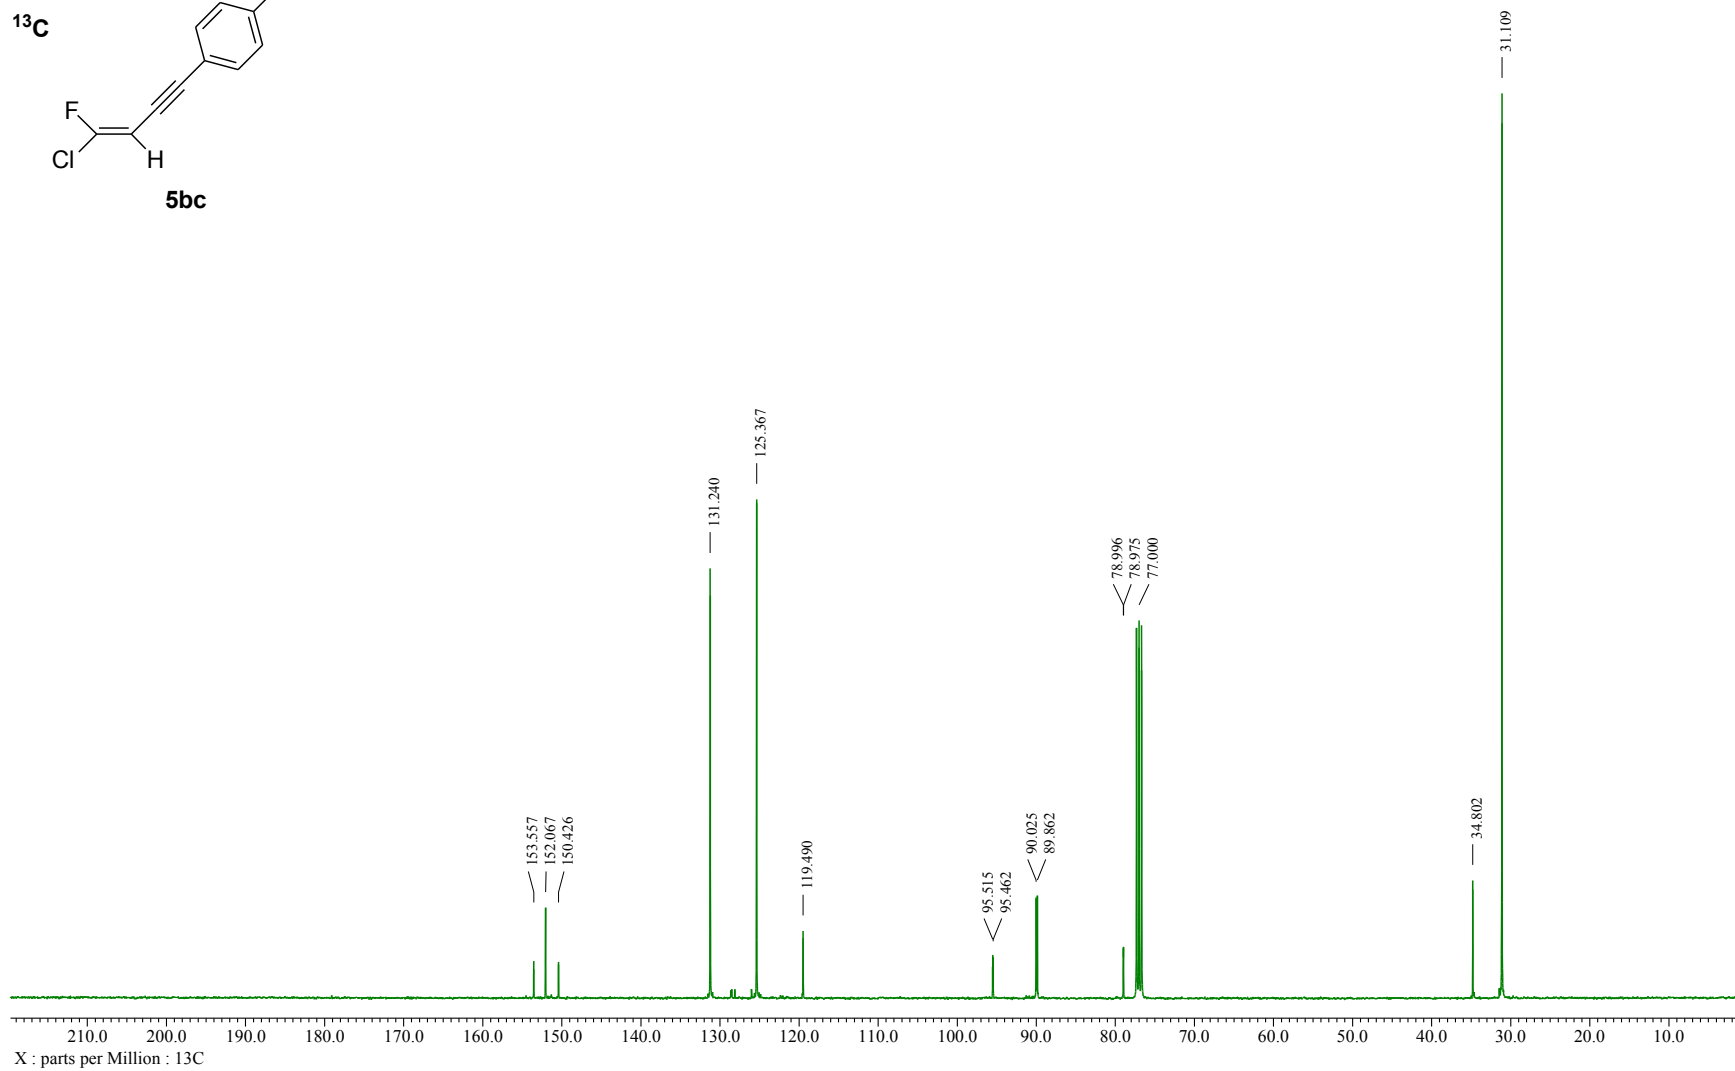

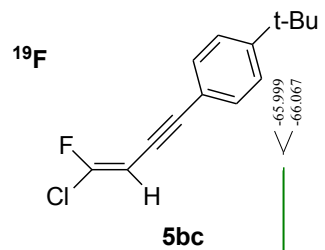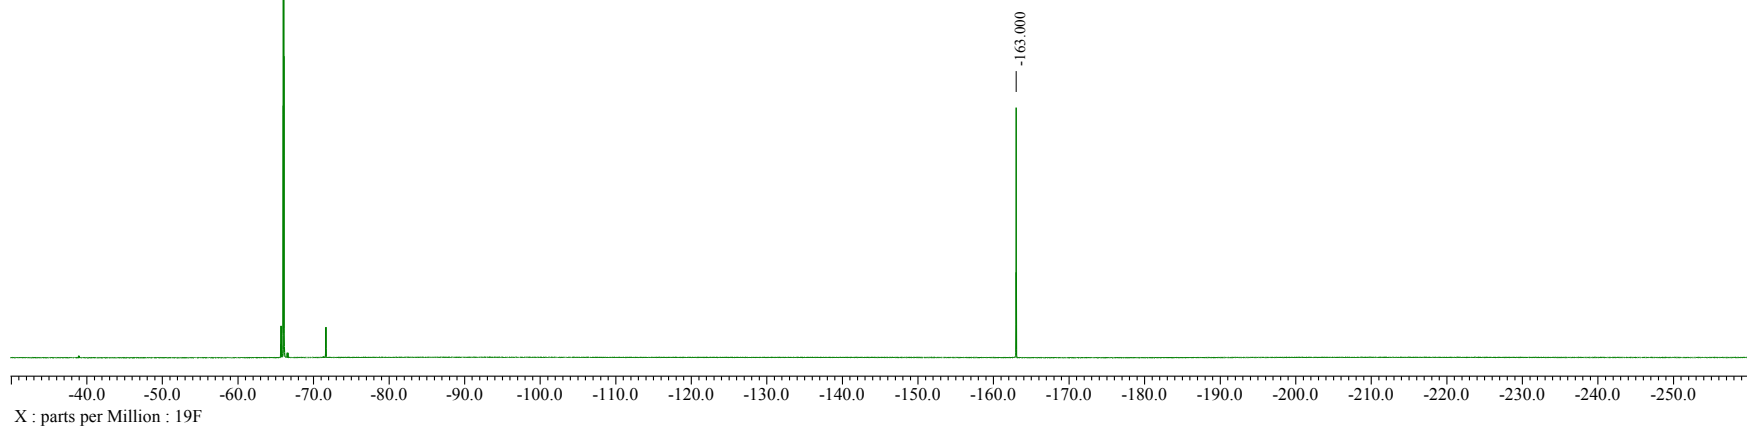



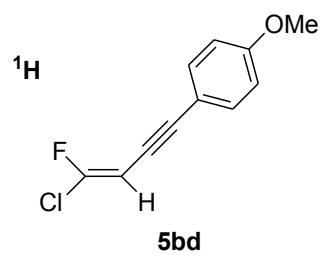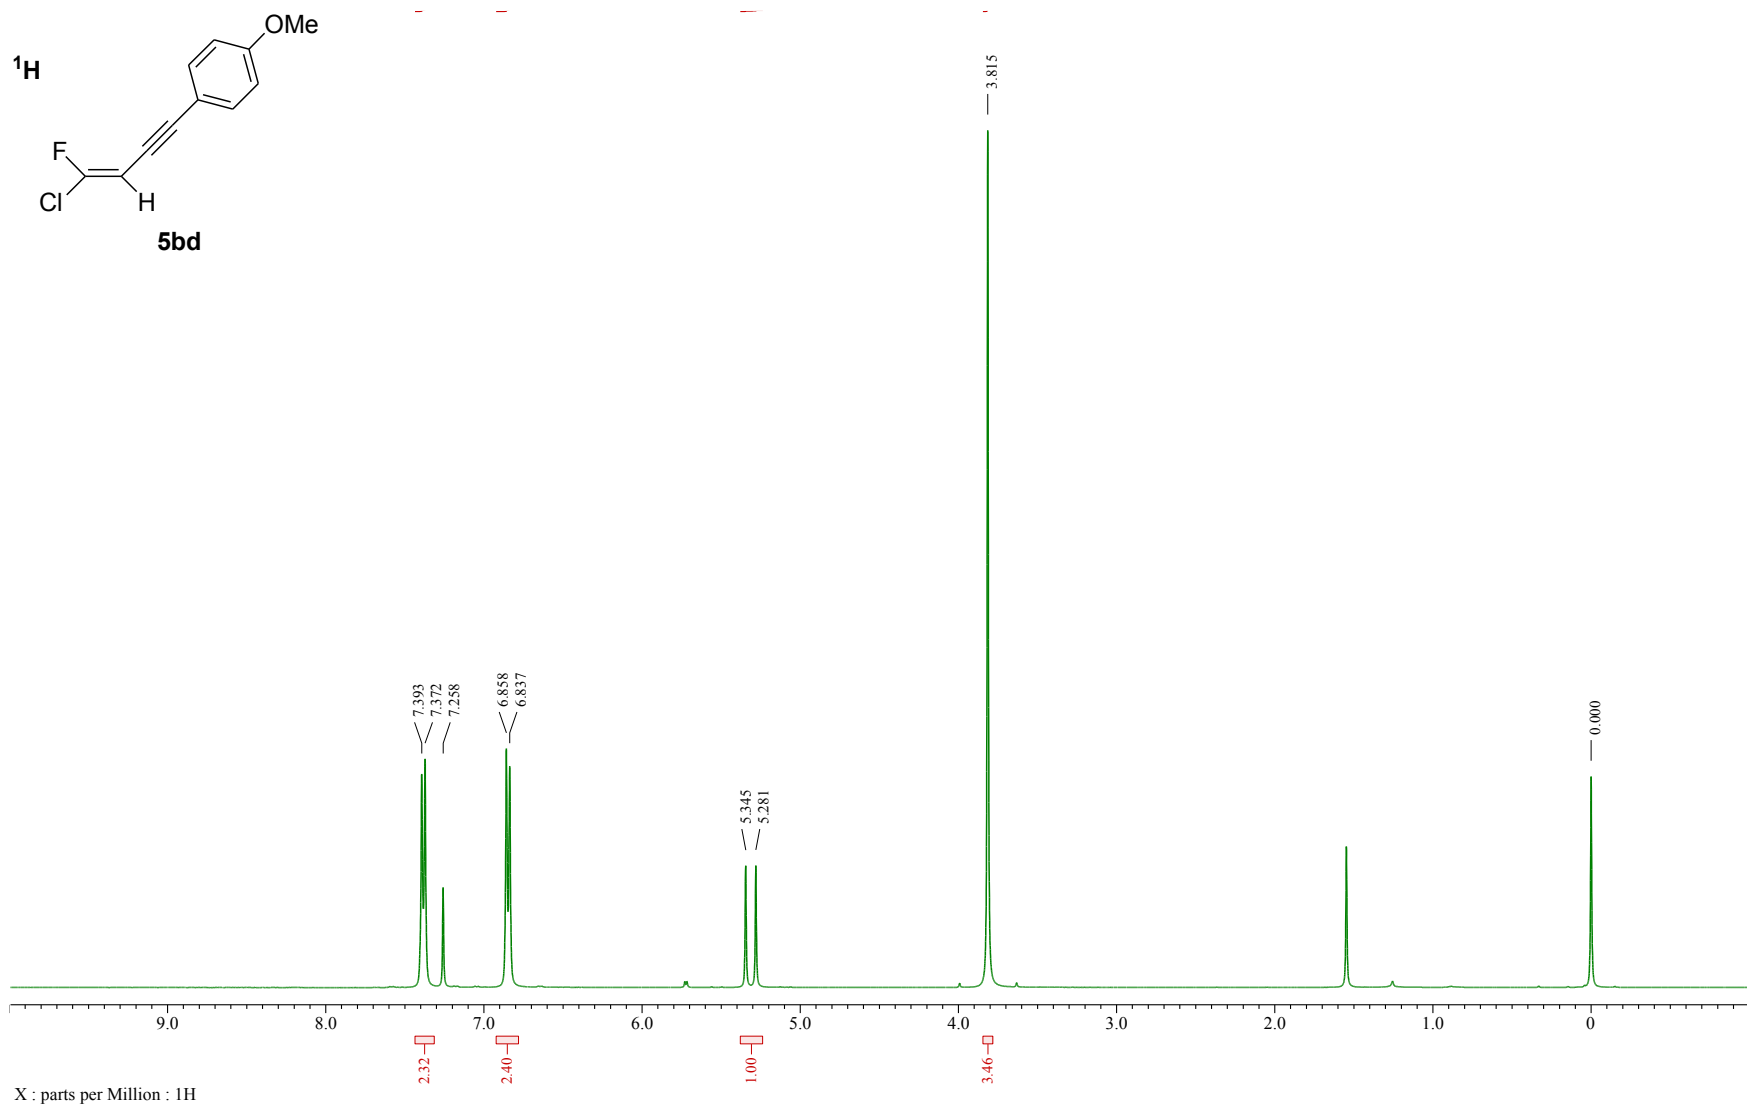

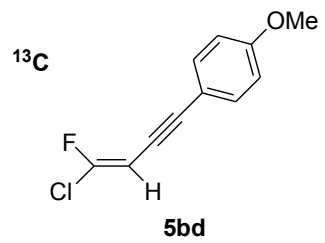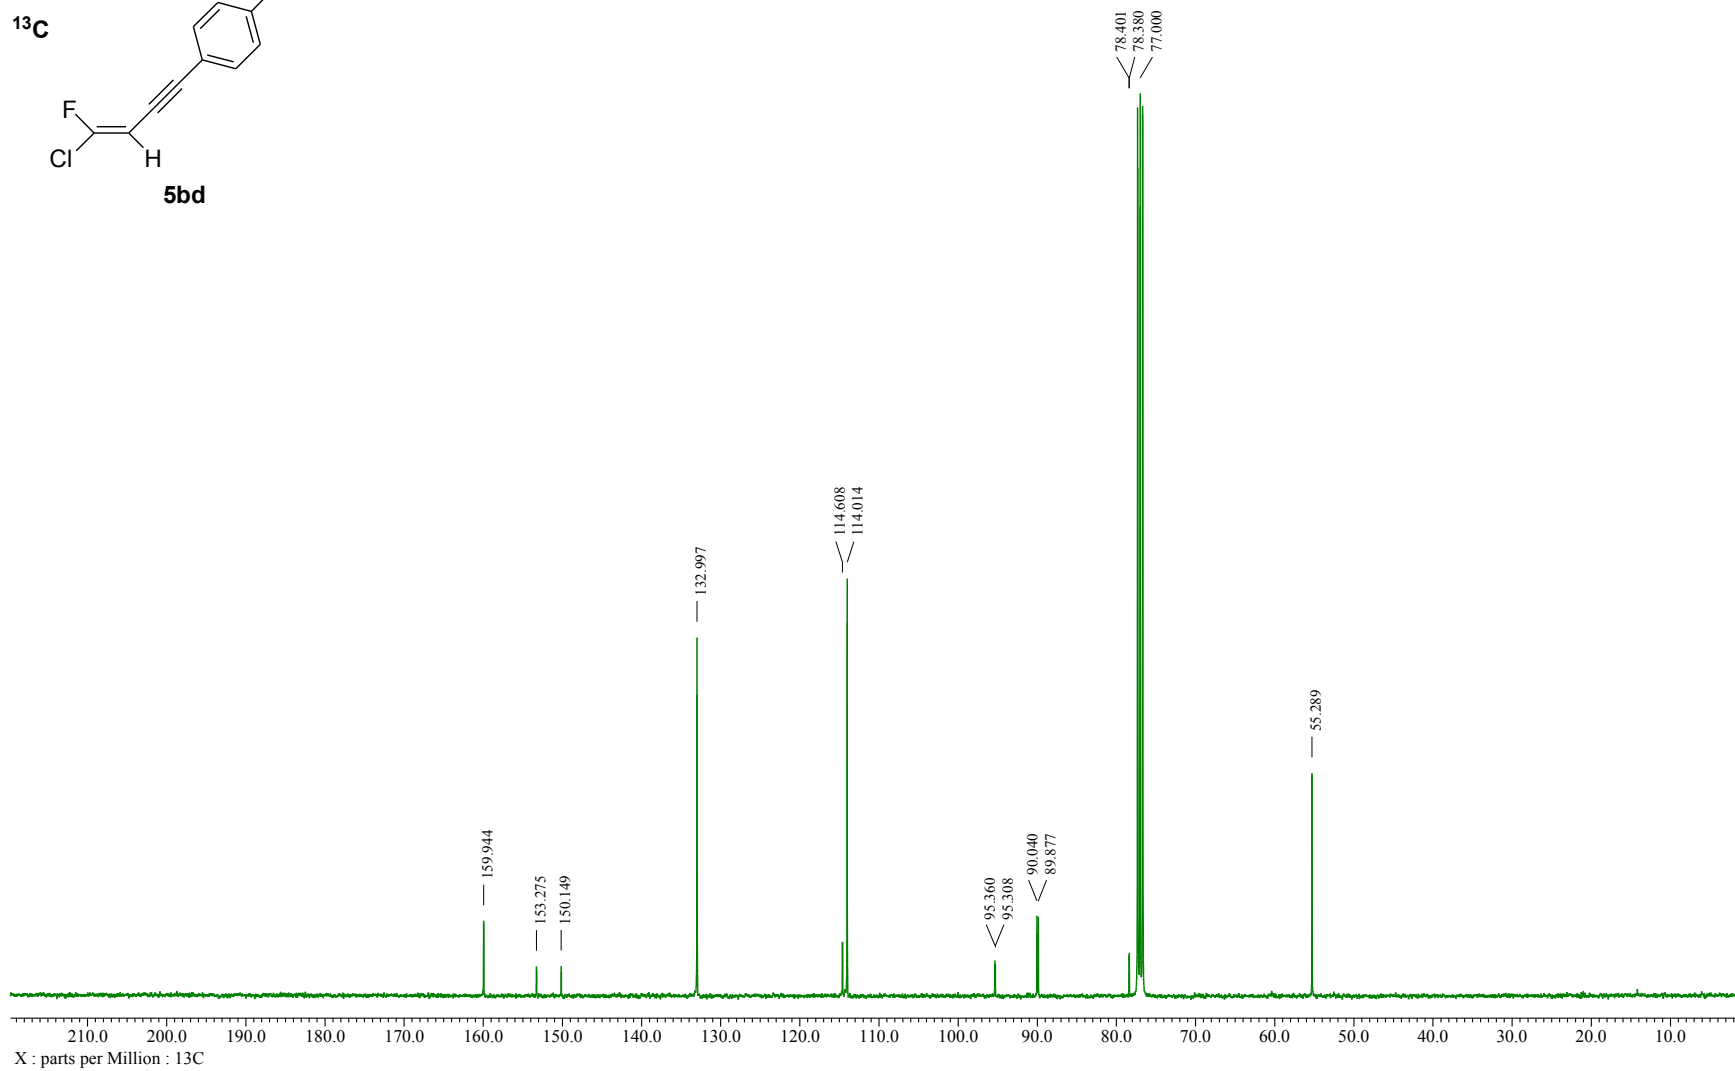

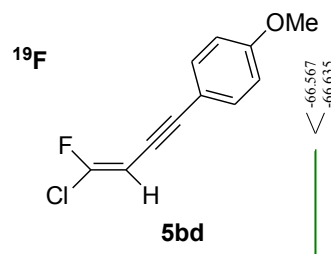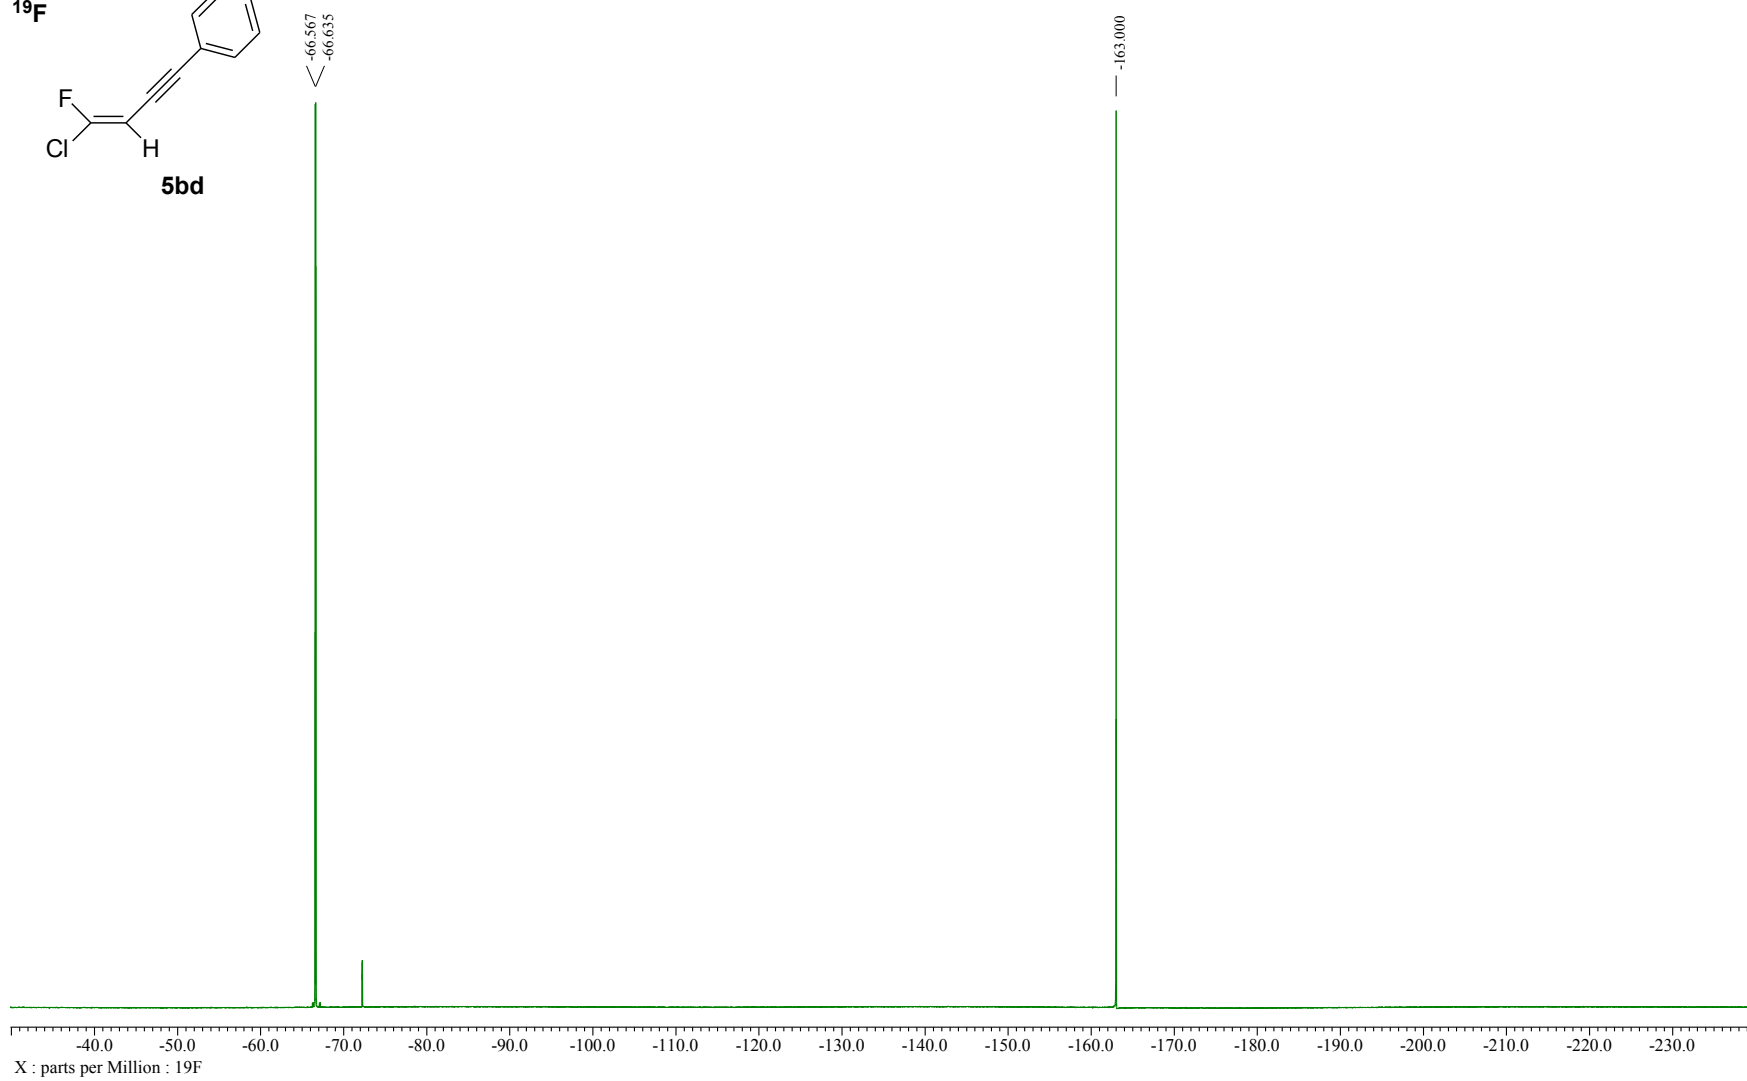

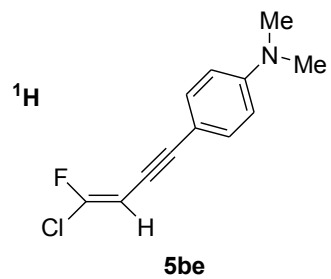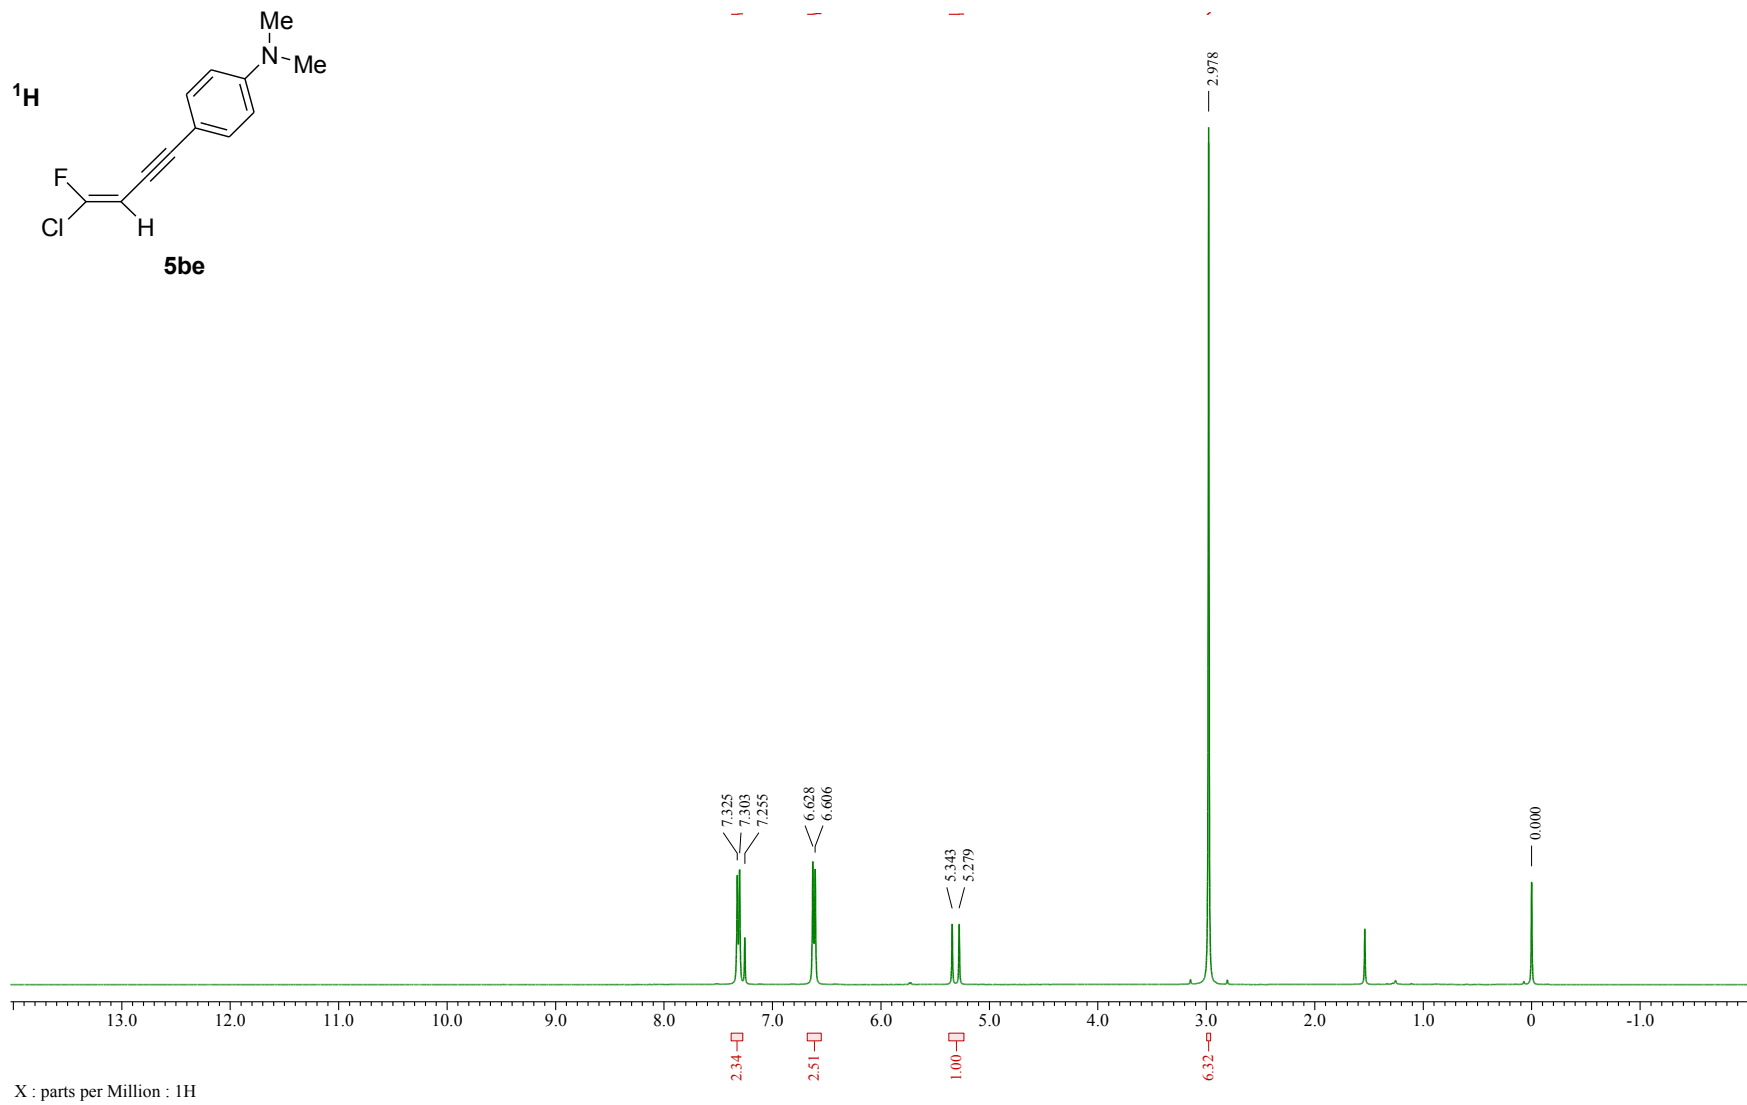

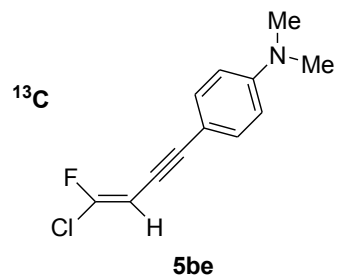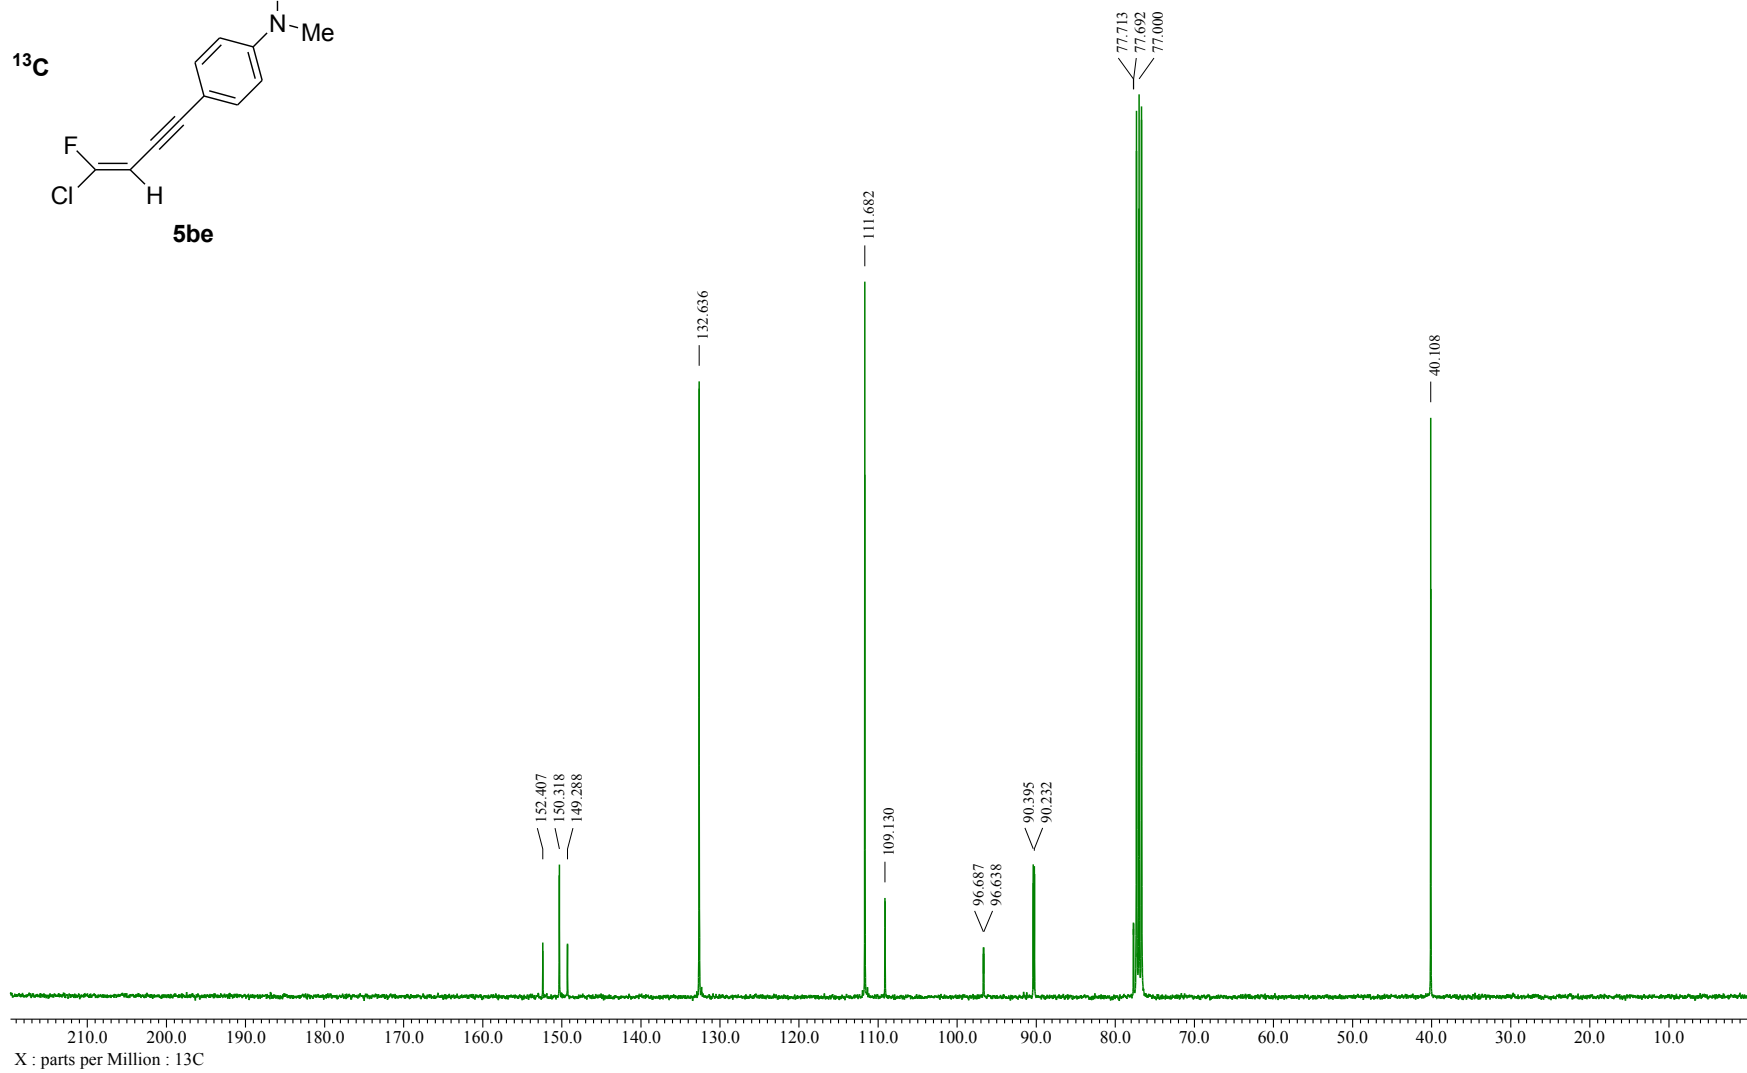

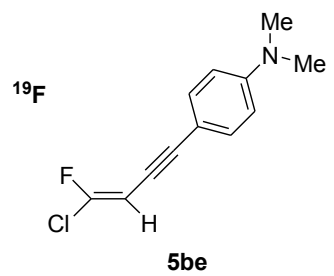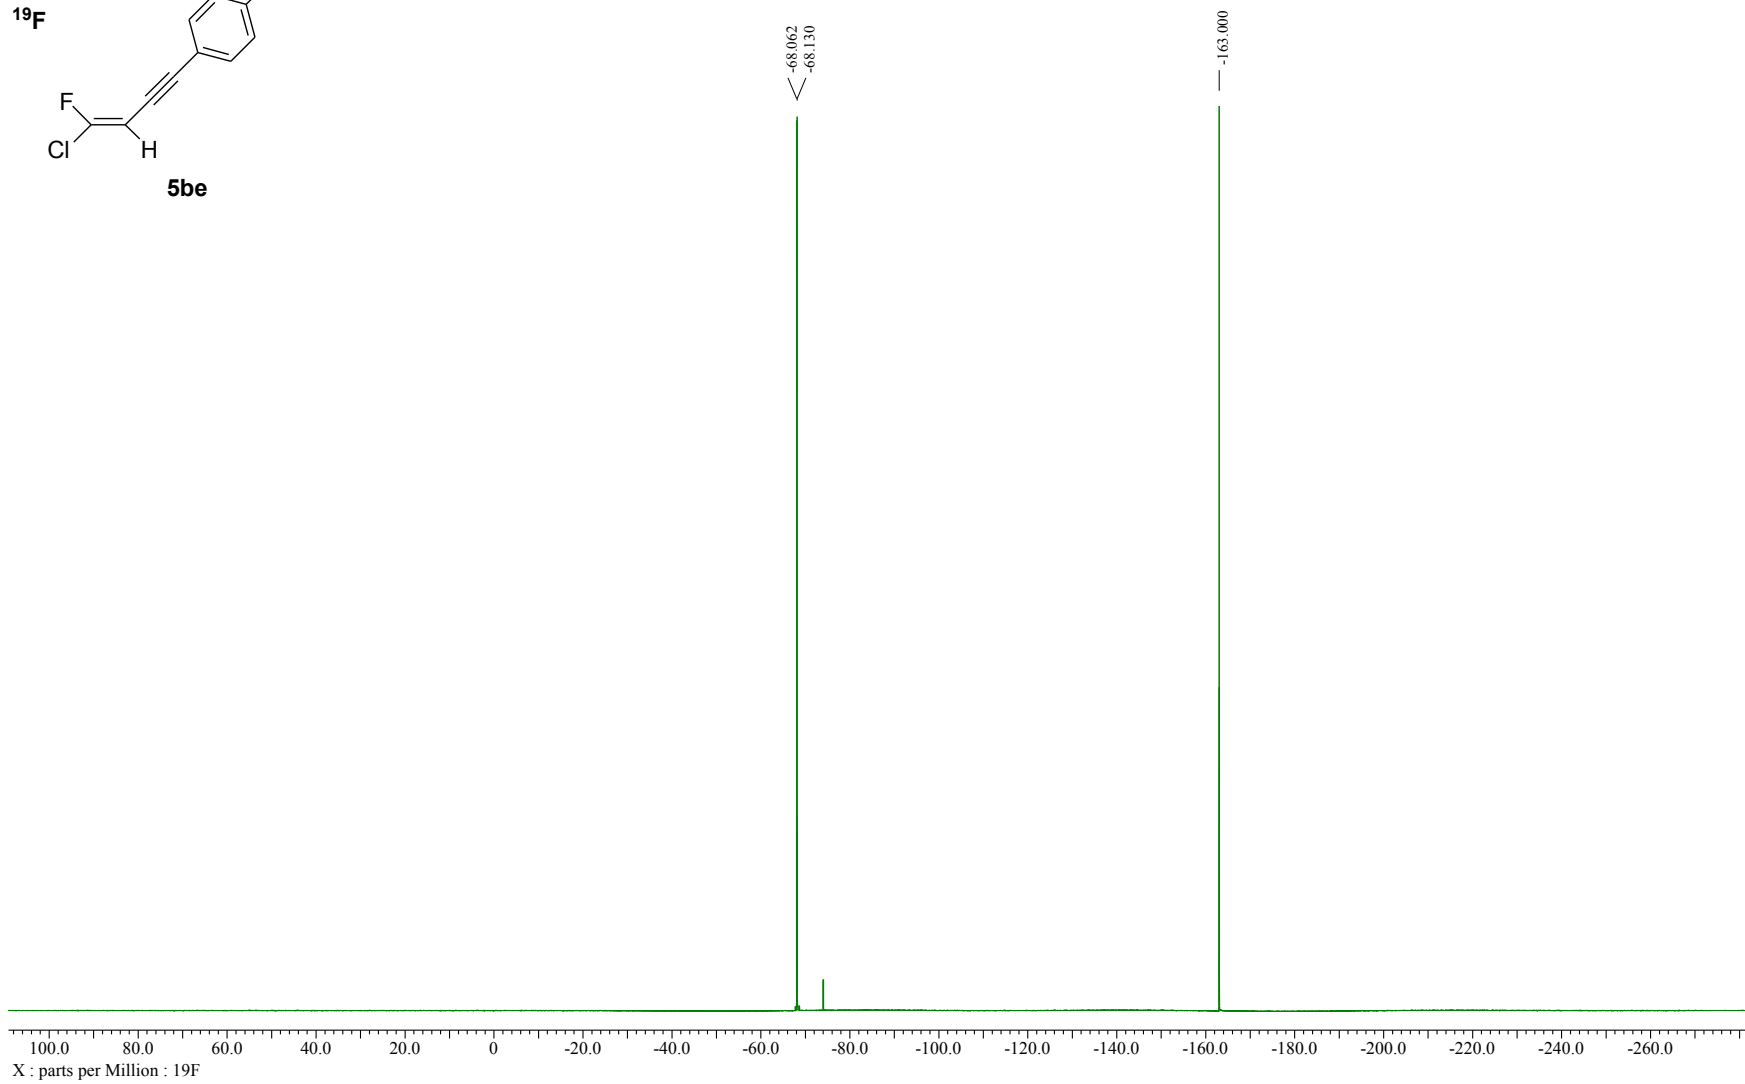

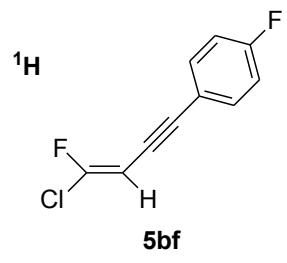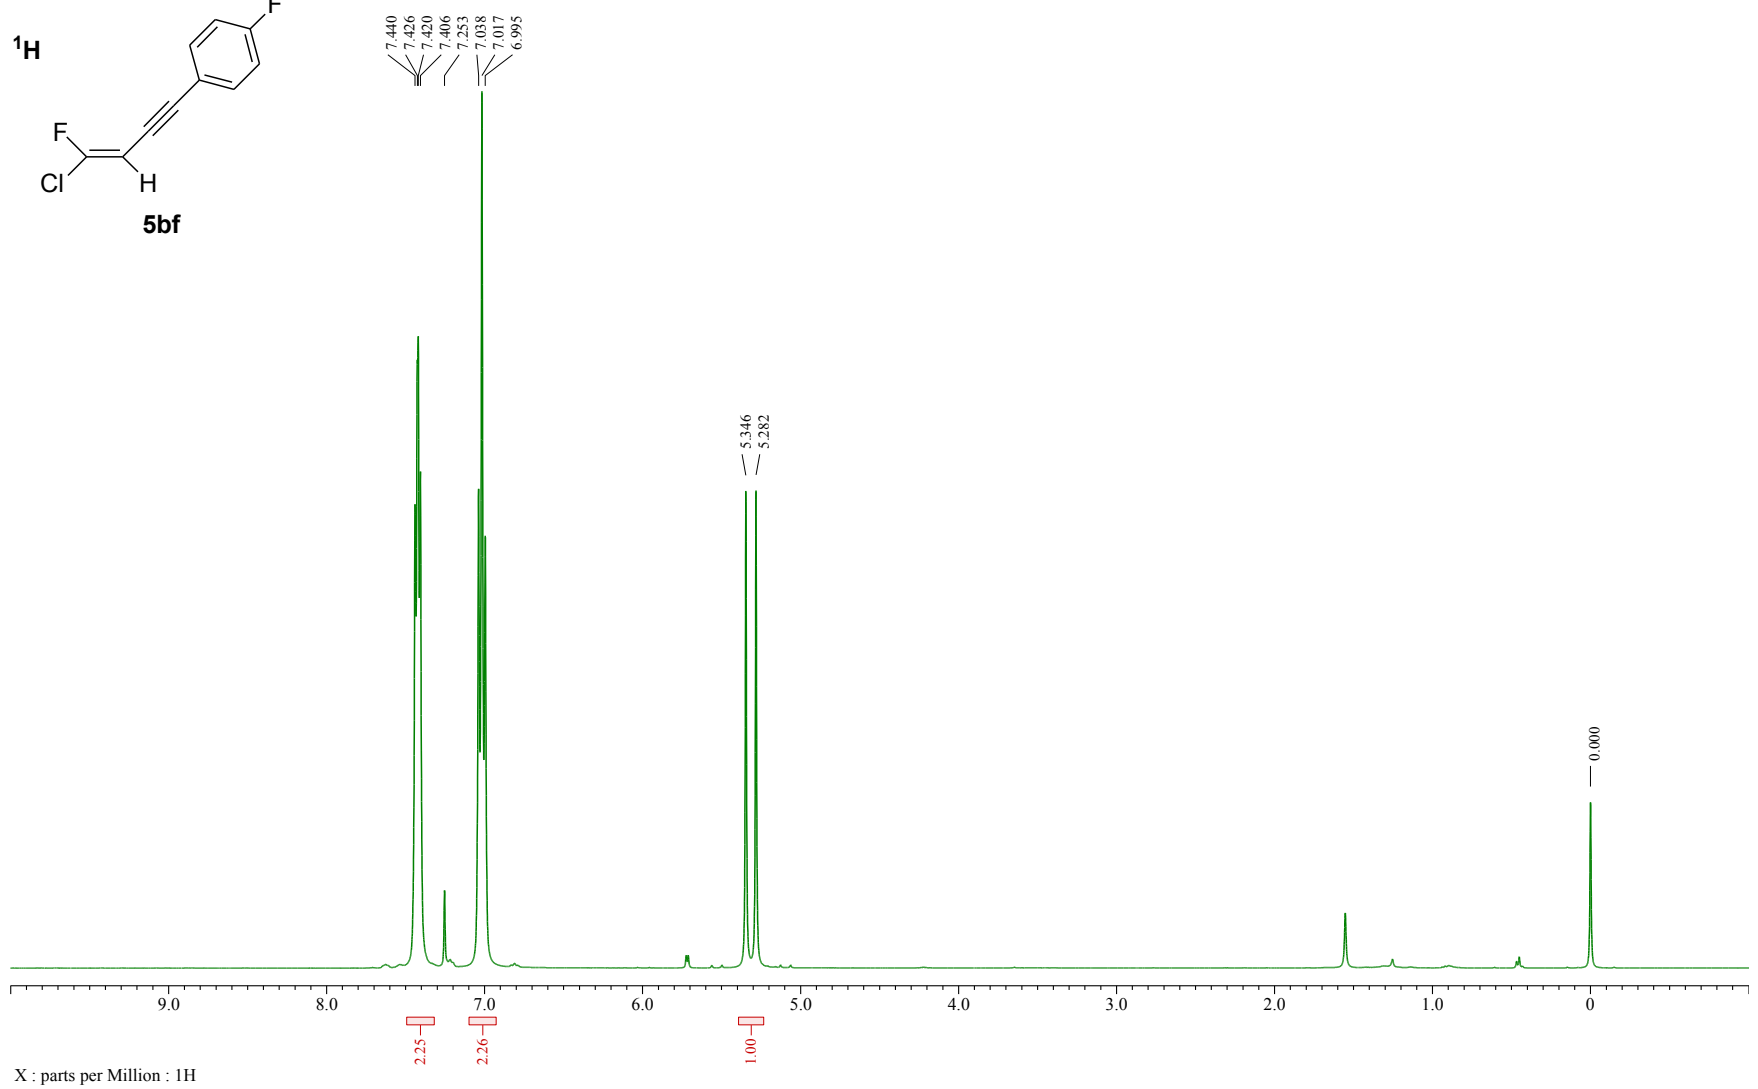

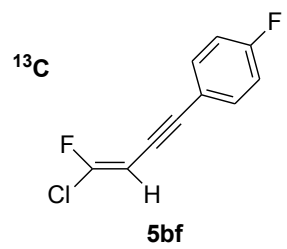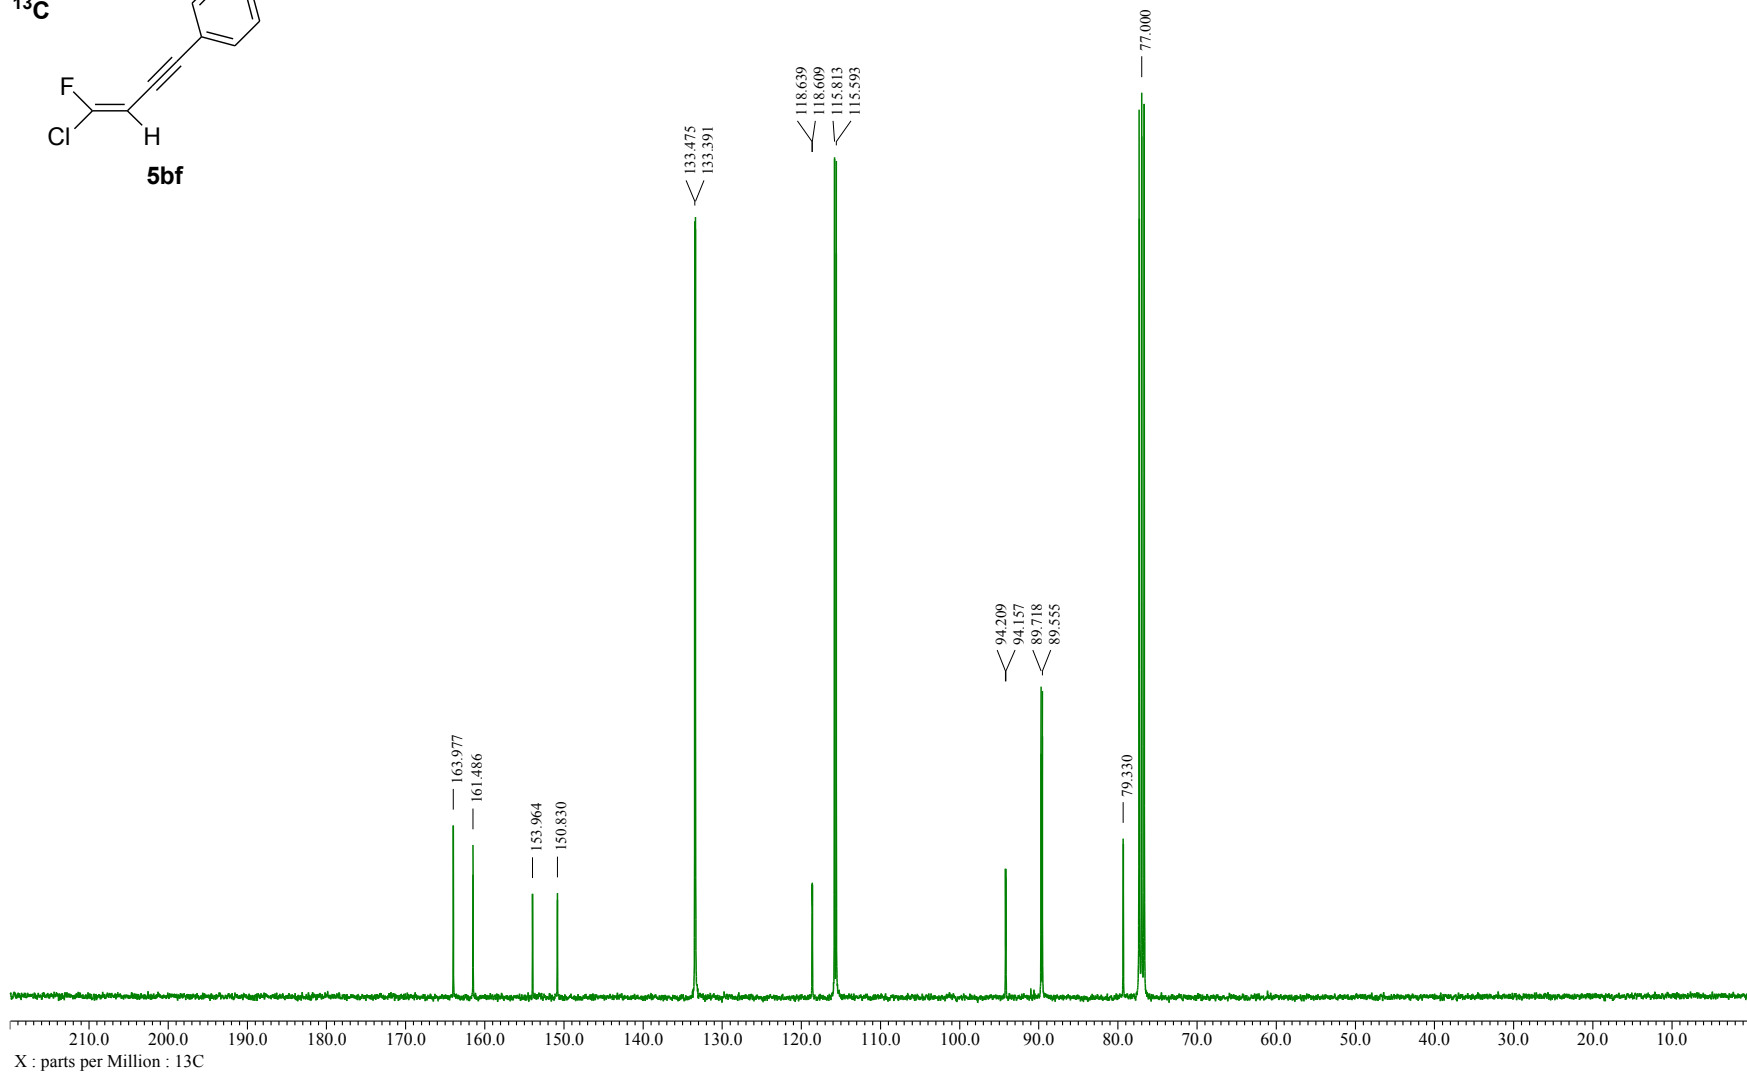



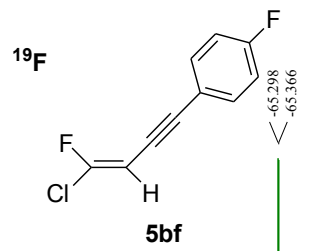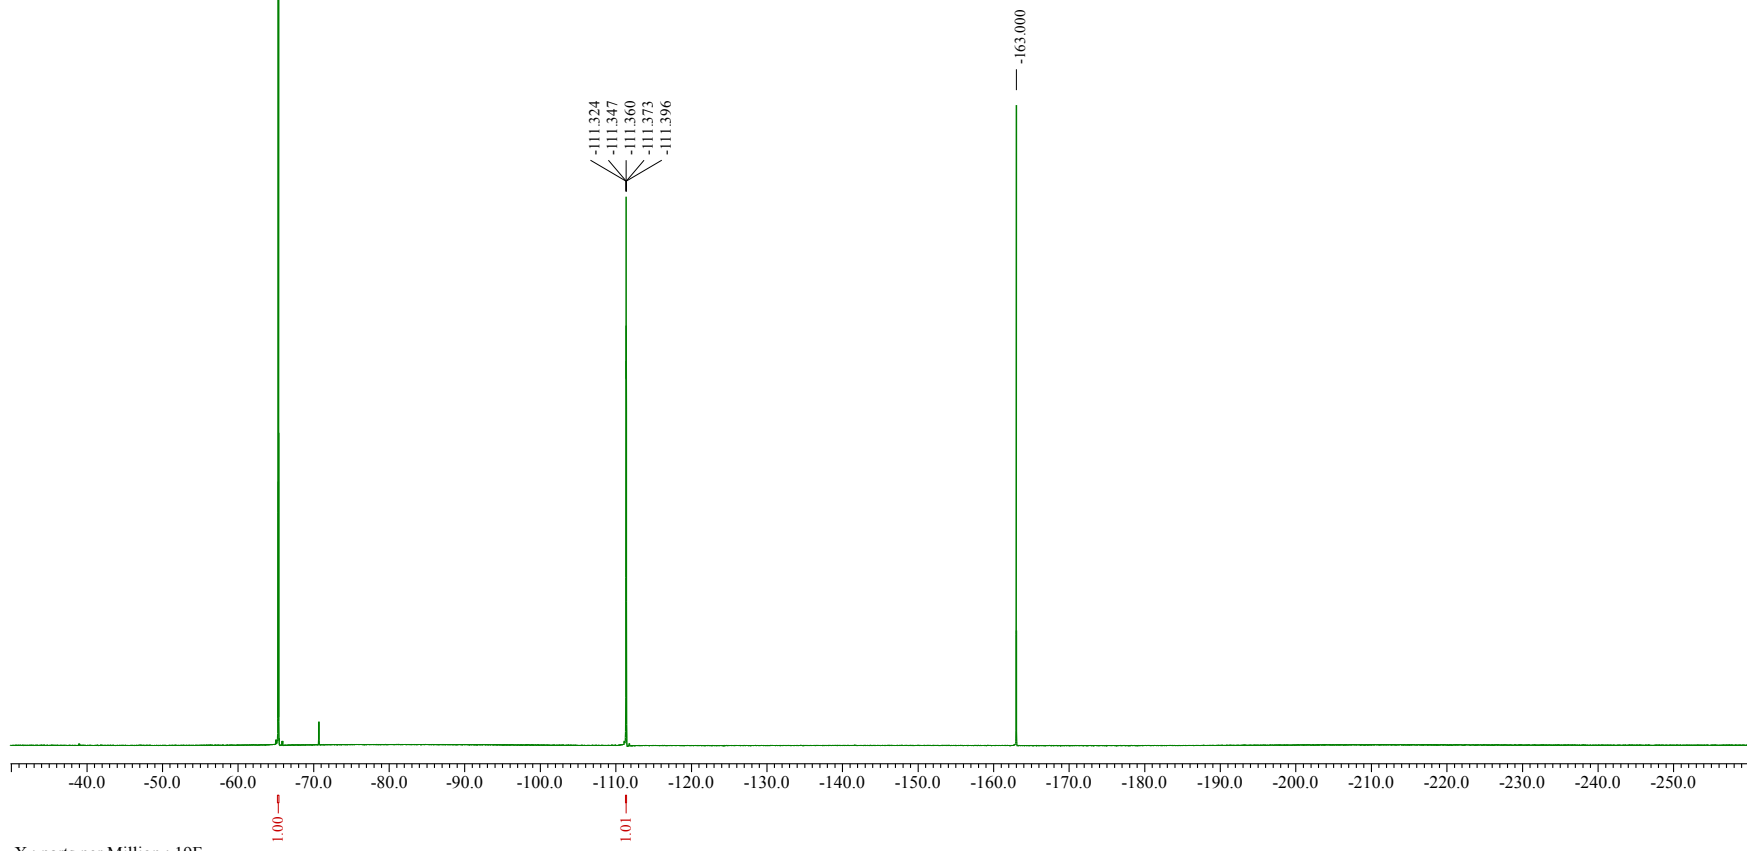

X : parts per Million : 19F

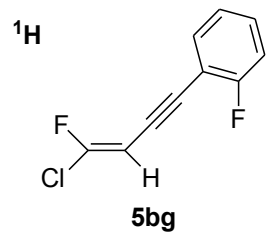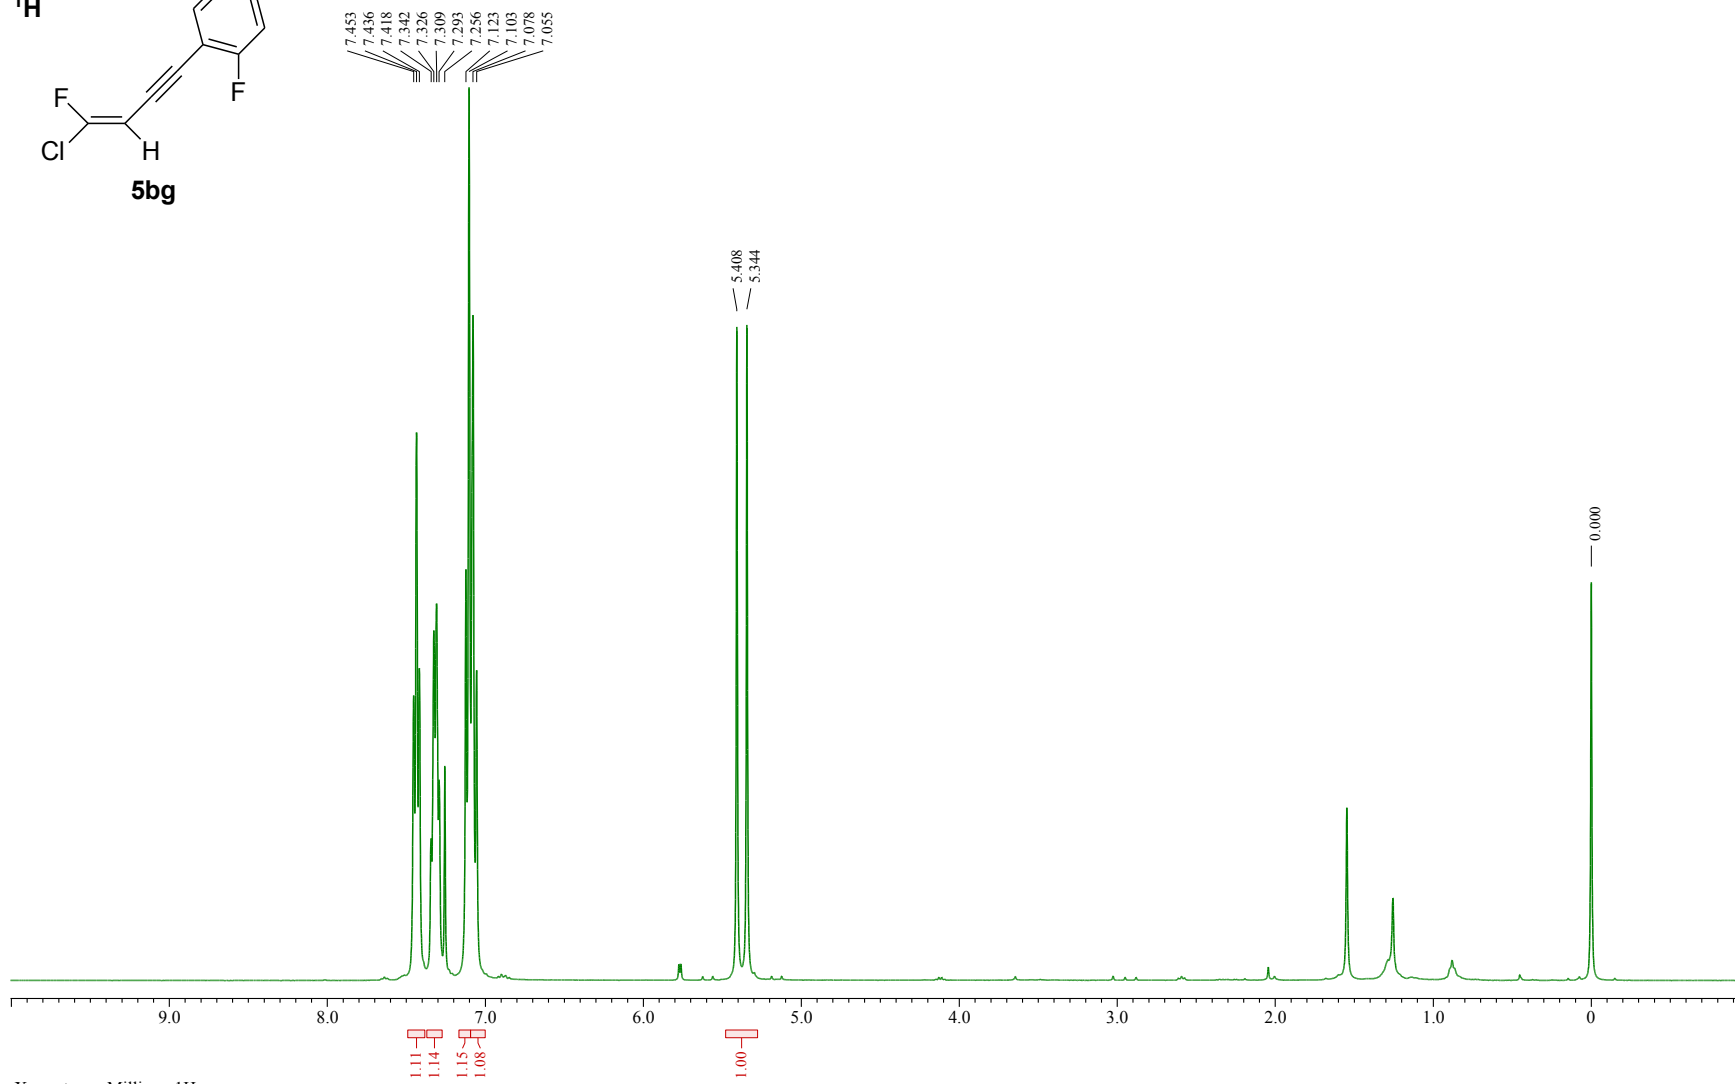

<sup>13</sup>C

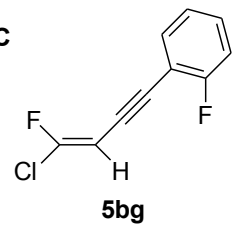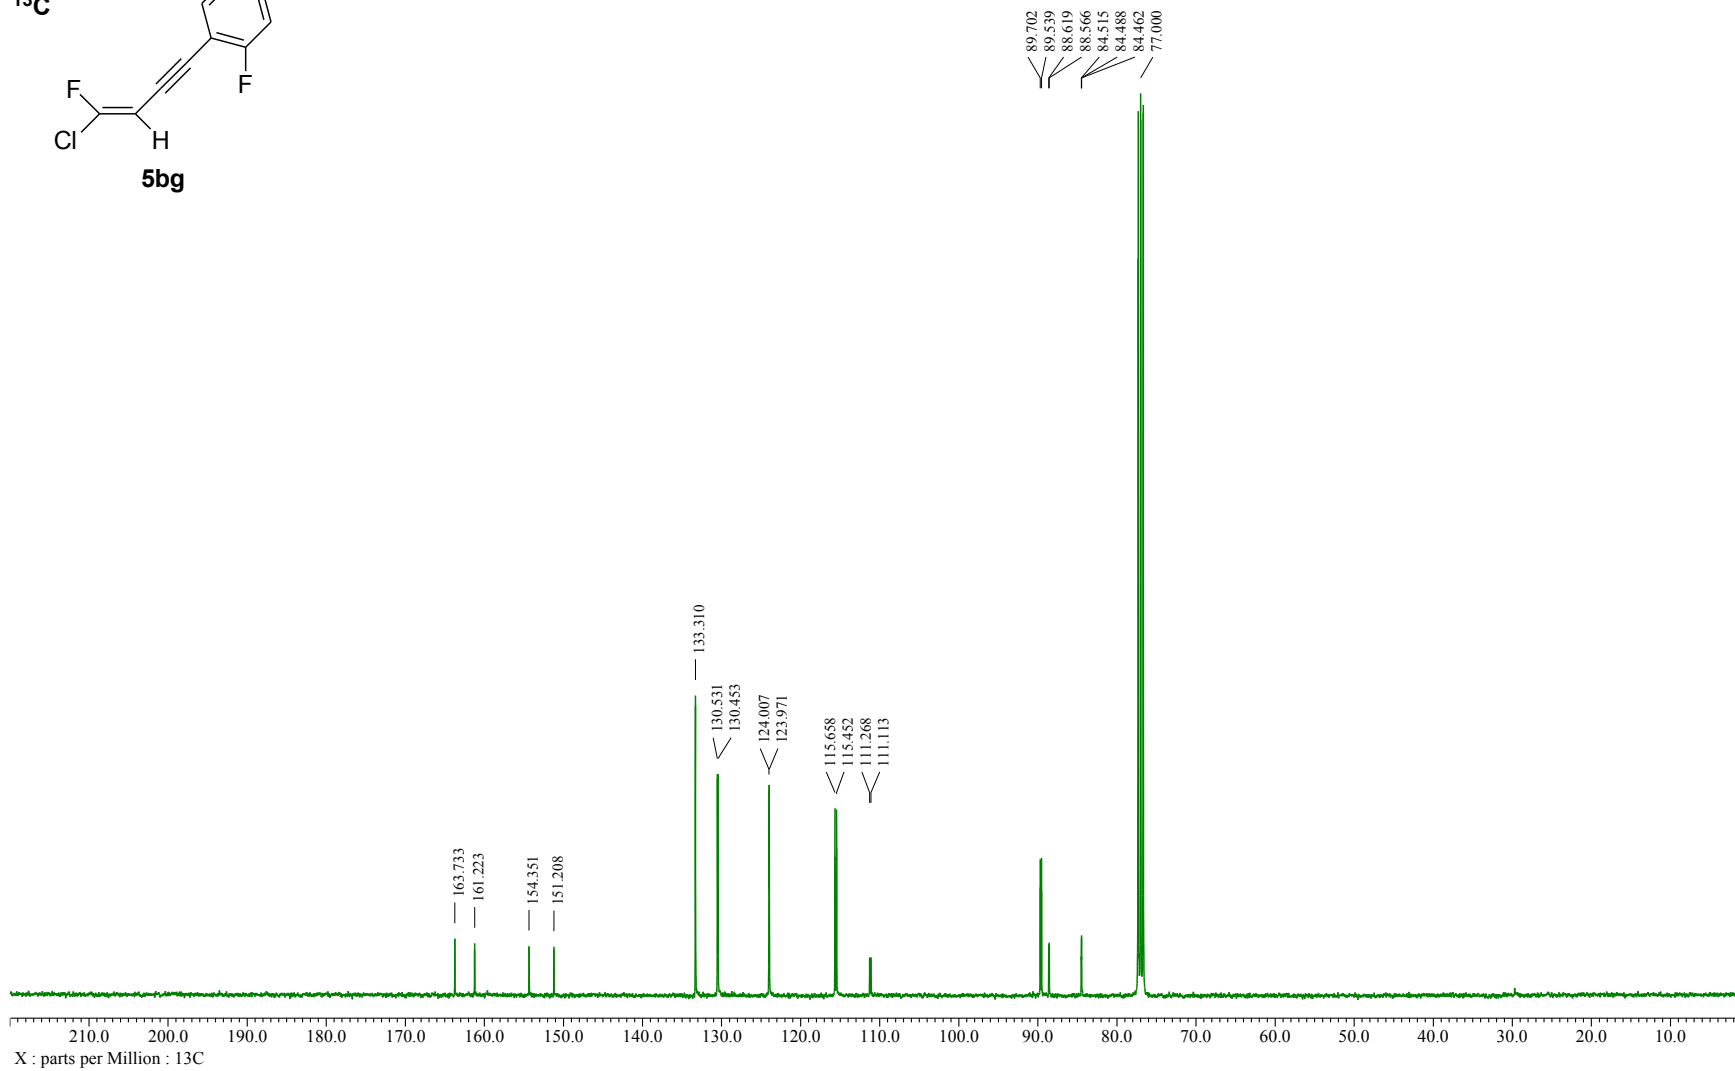

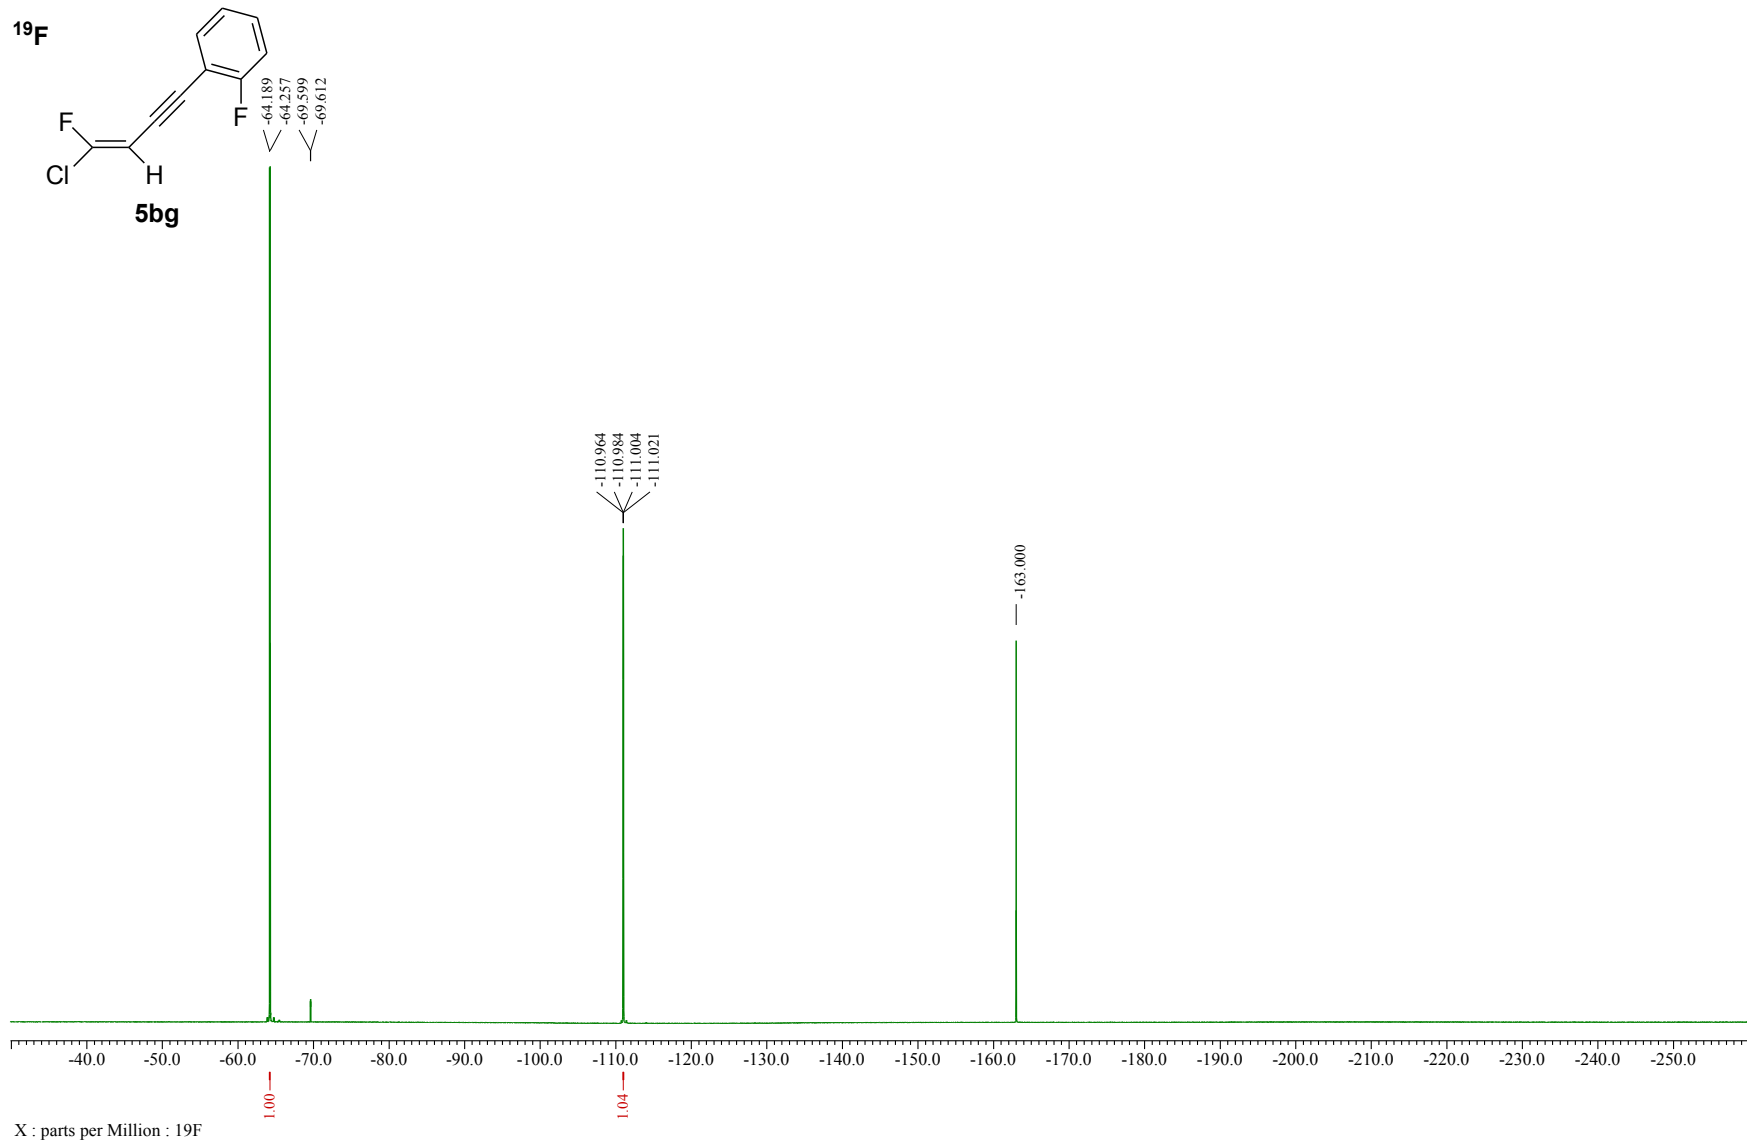

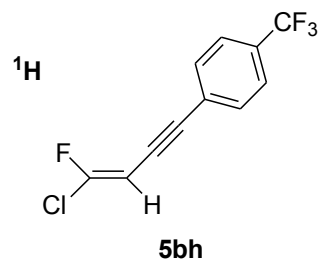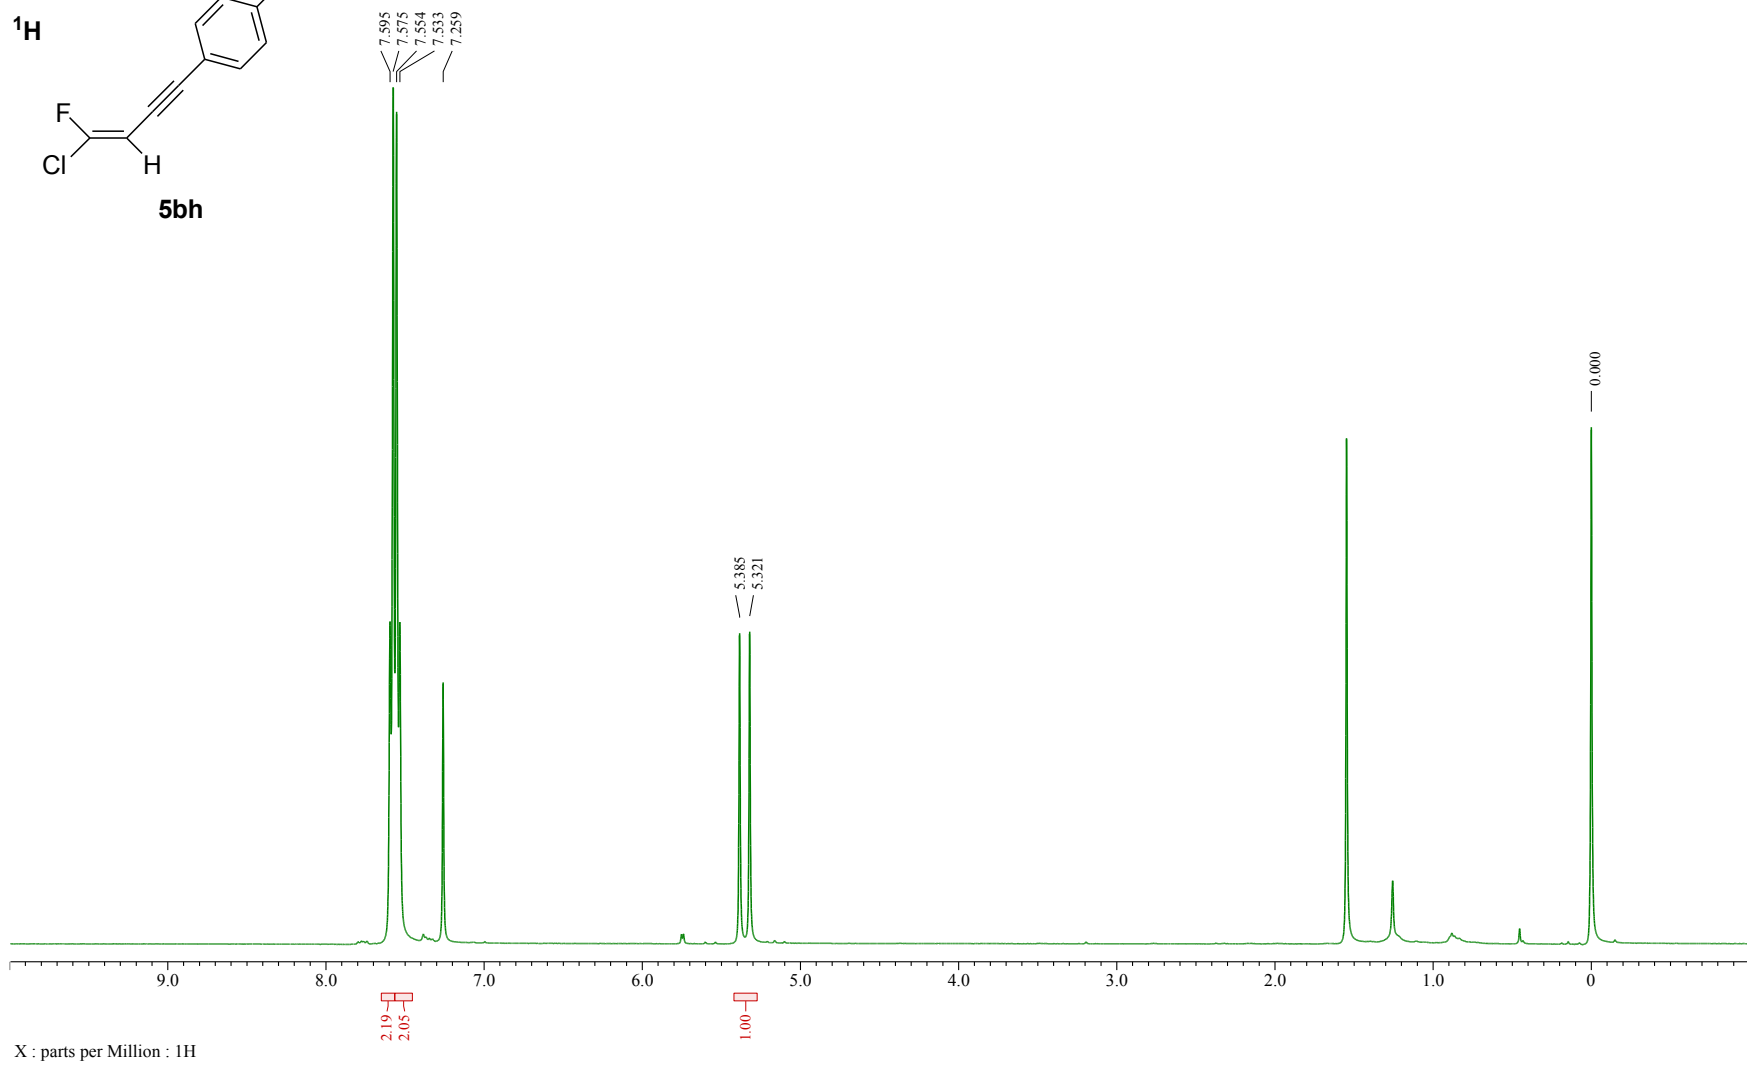

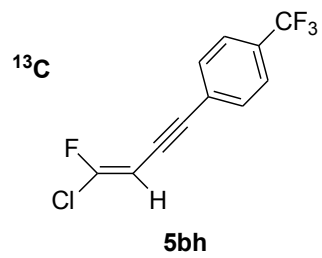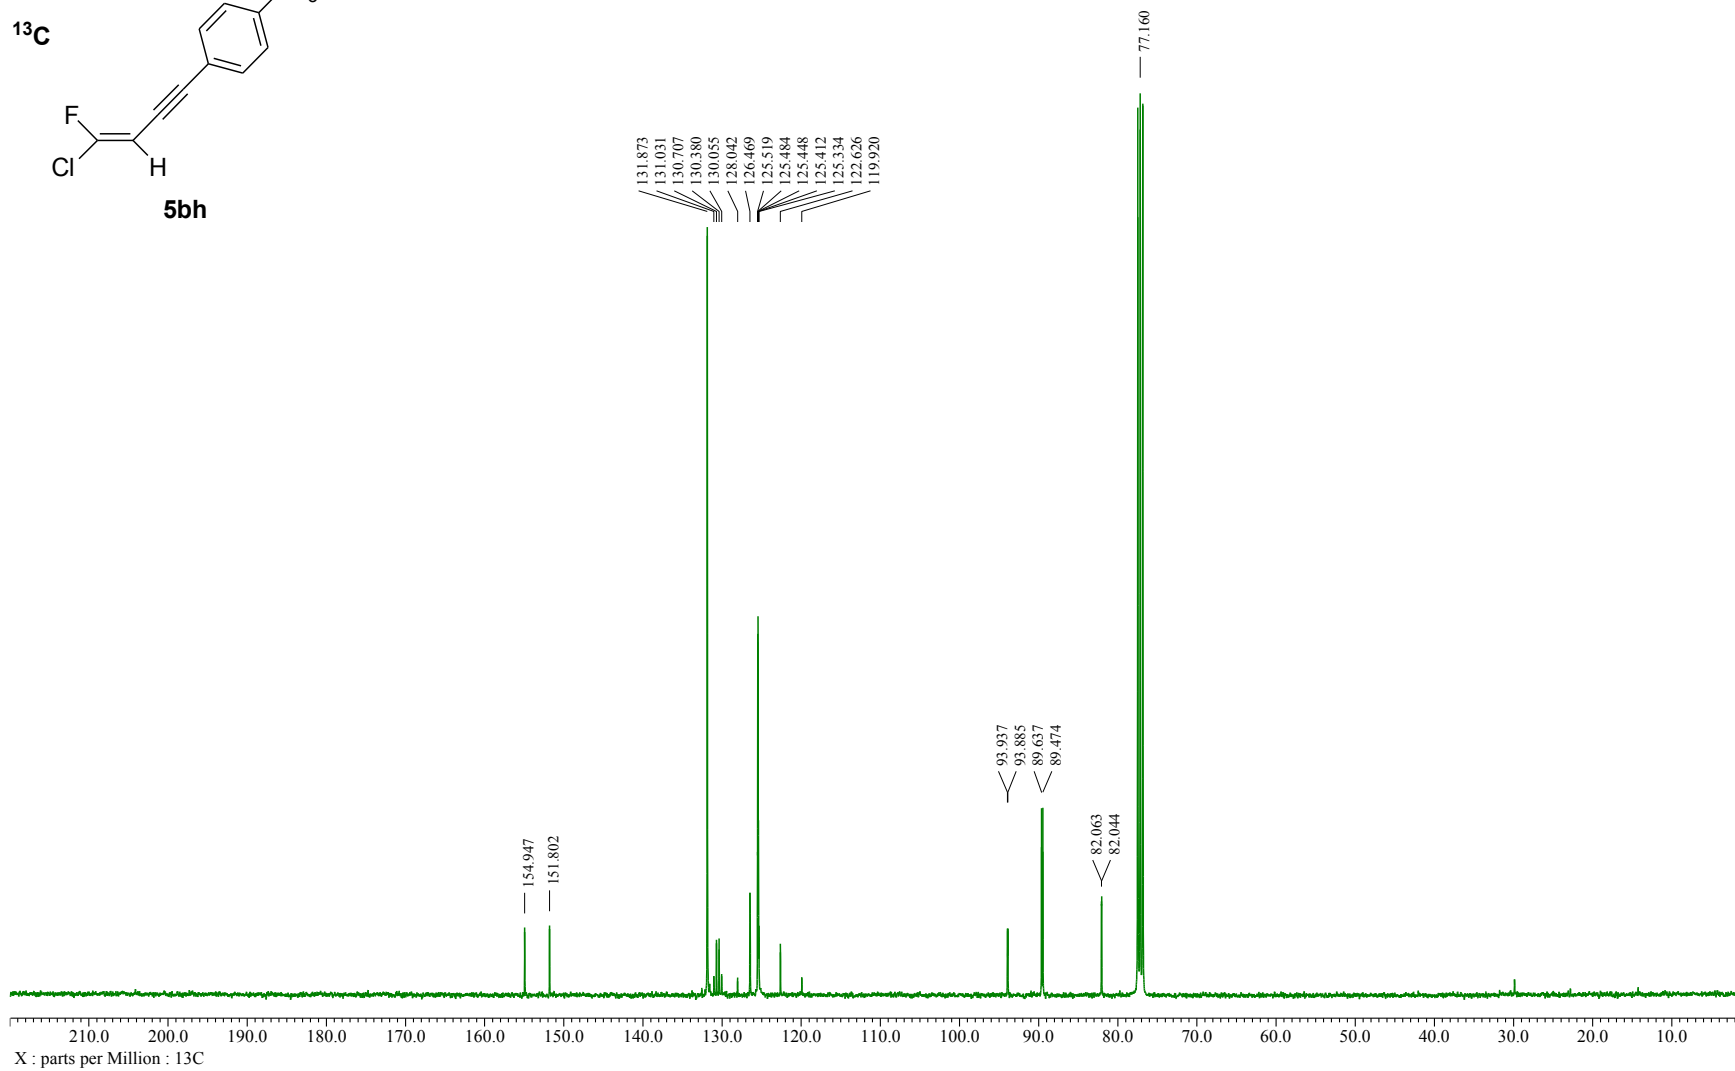

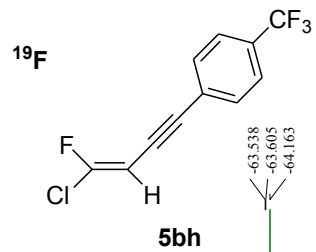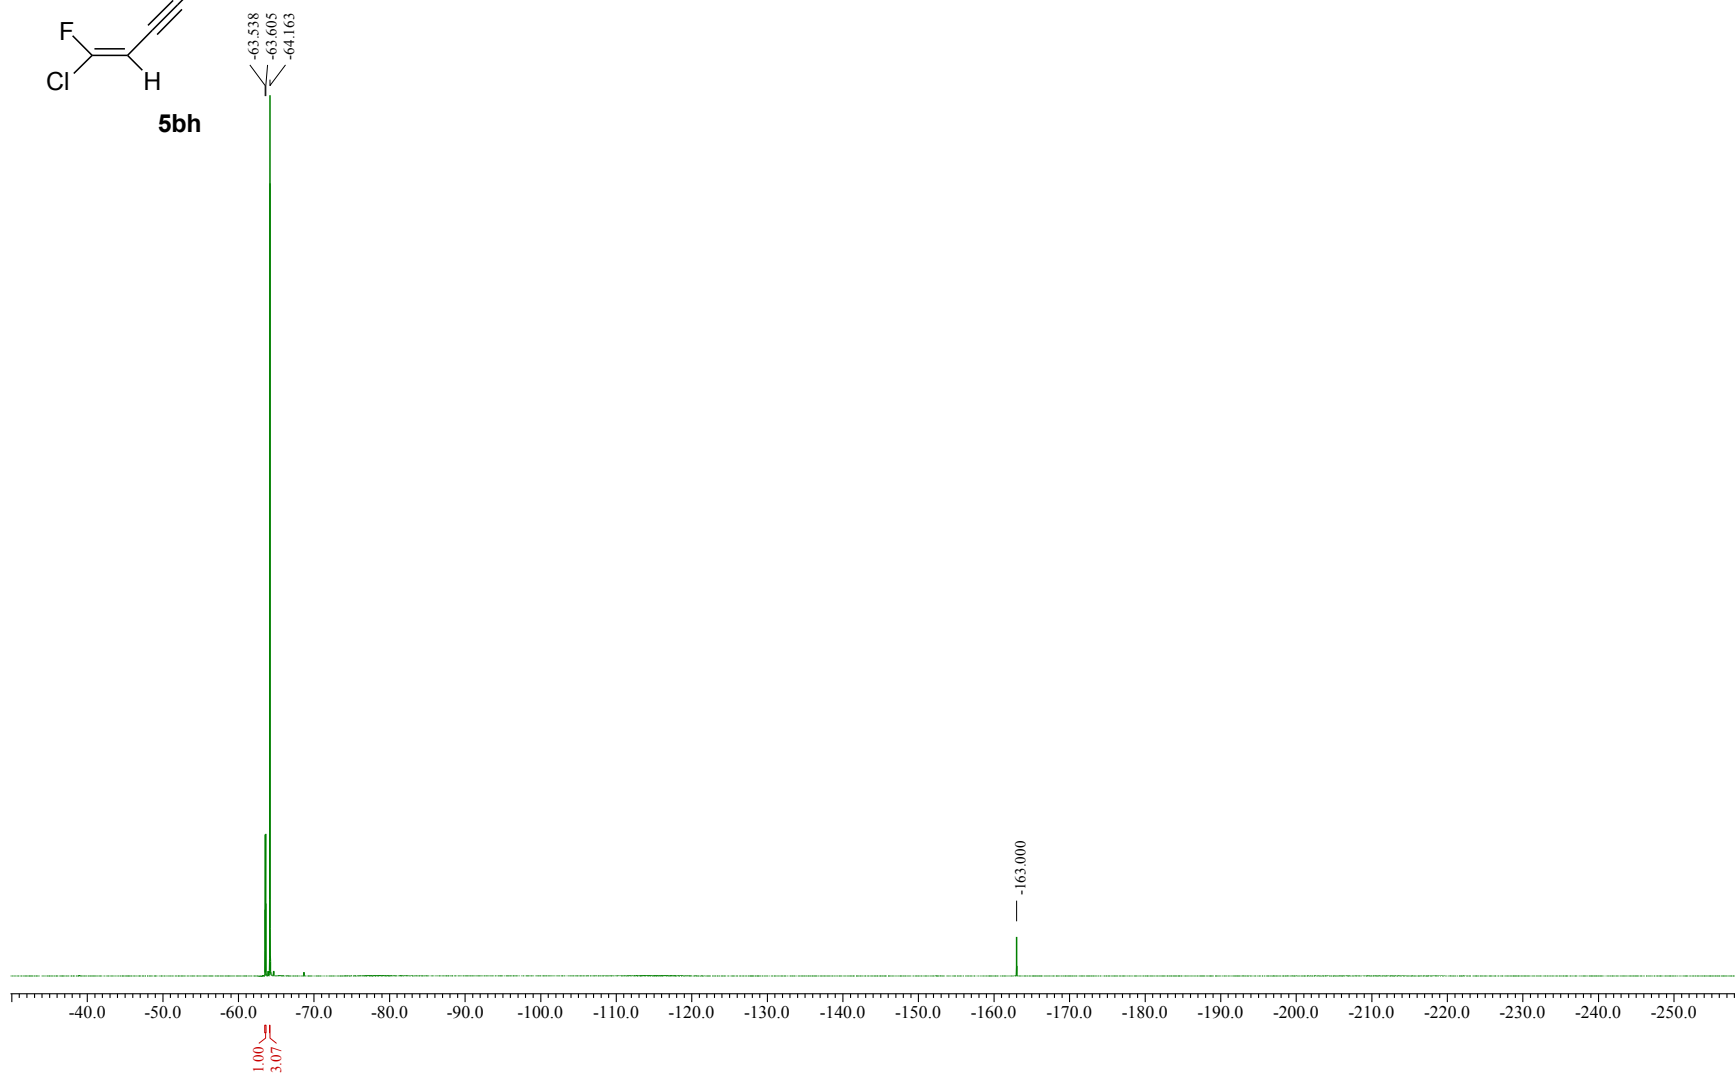

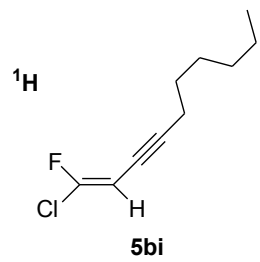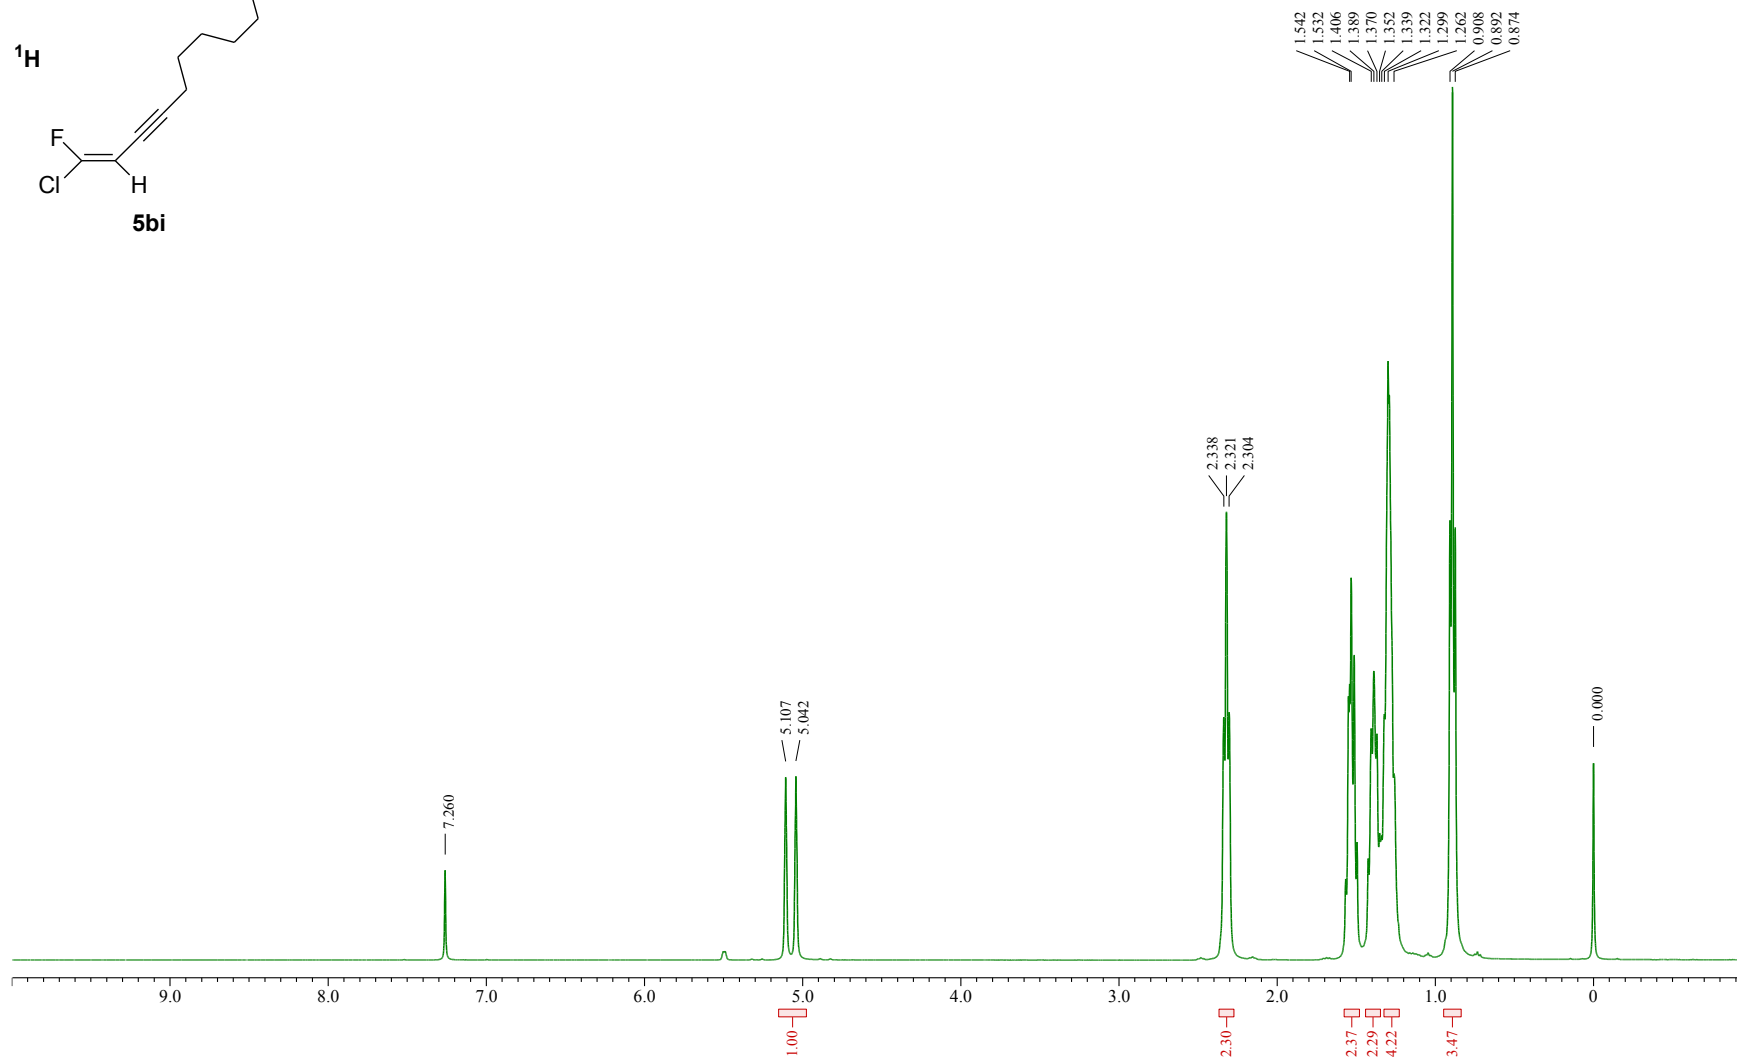

X : parts per Million : 1H



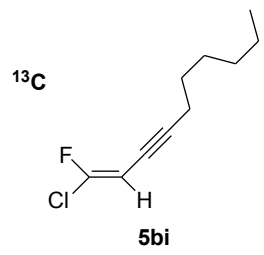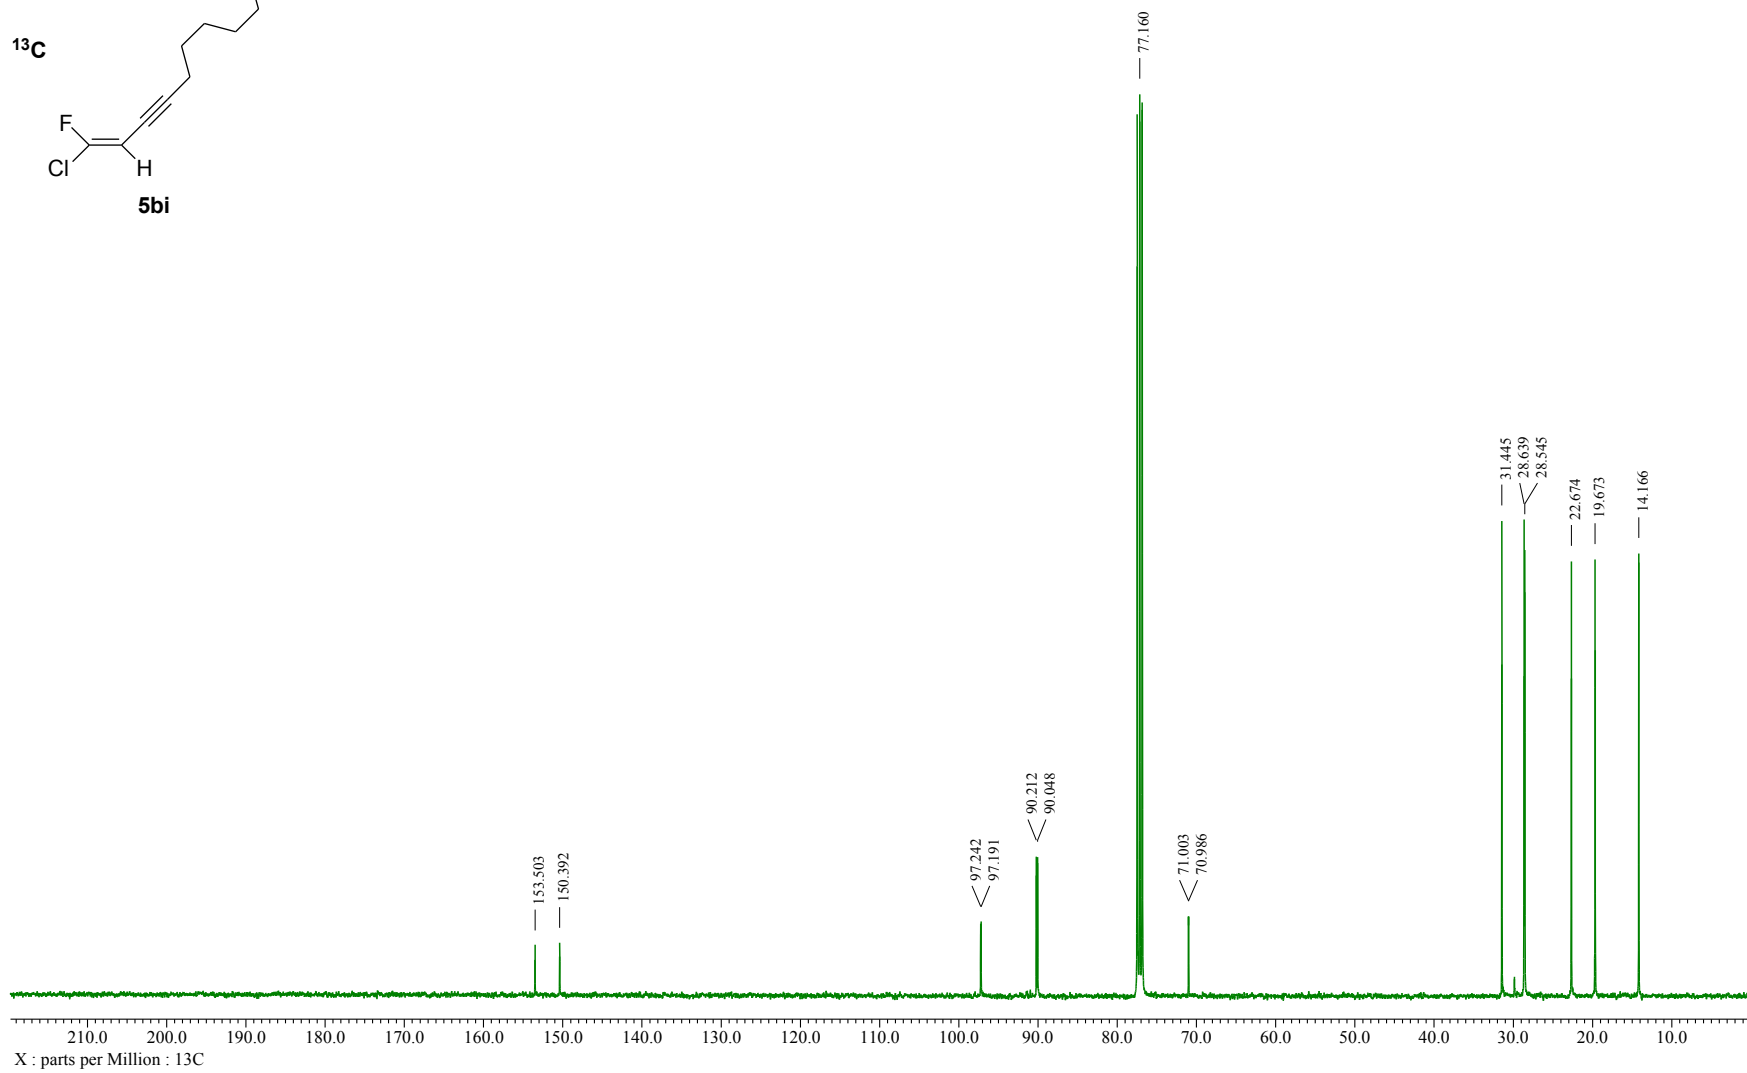

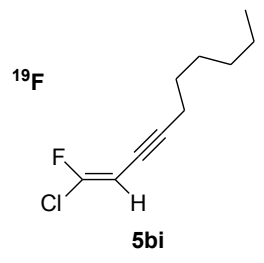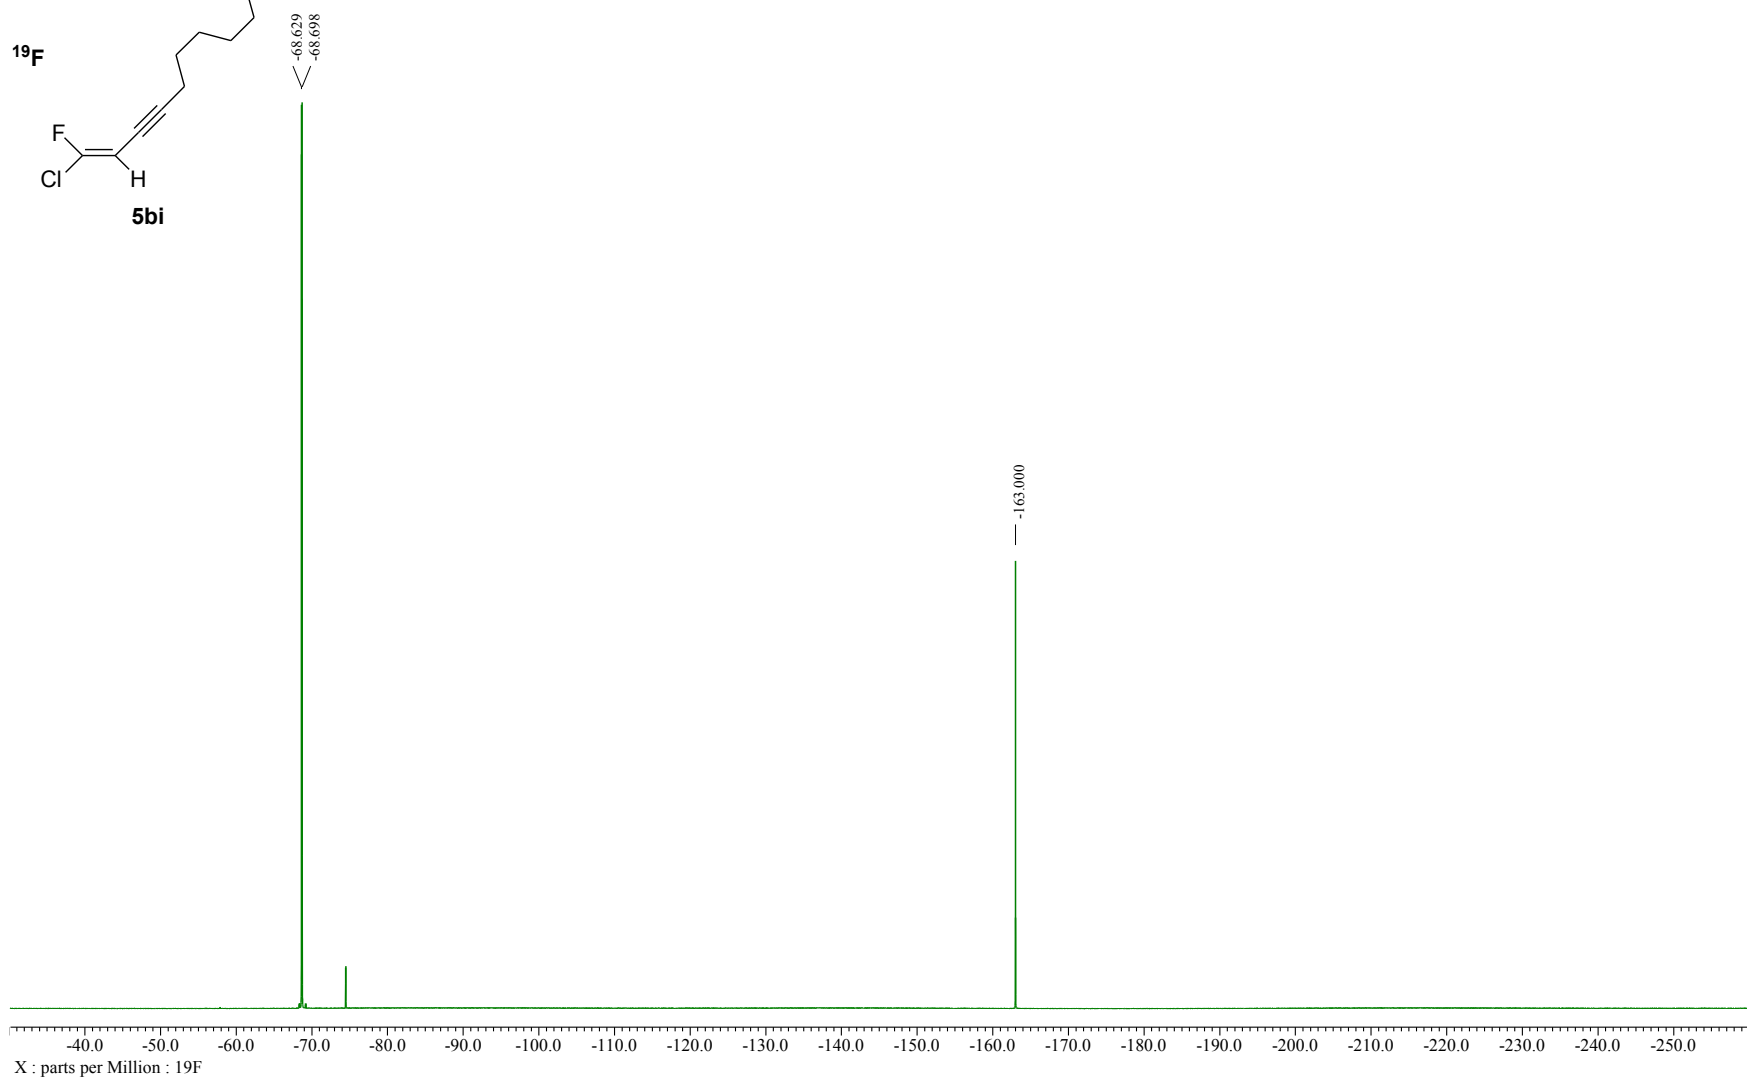

ファイル :D:\花本GC\個人フォルダ\田中(凜)\佐藤さんの実験\RT2\_9.21\_119\_F005\_0.5h.D  
 ...  
 オペレータ :  
 機器 : MSD  
 測定日時 : 21 Sep 2021 17:02 (メソッド 20130419\_4\_IT70.M 使用)  
 サンプル名 :  
 一般情報 :

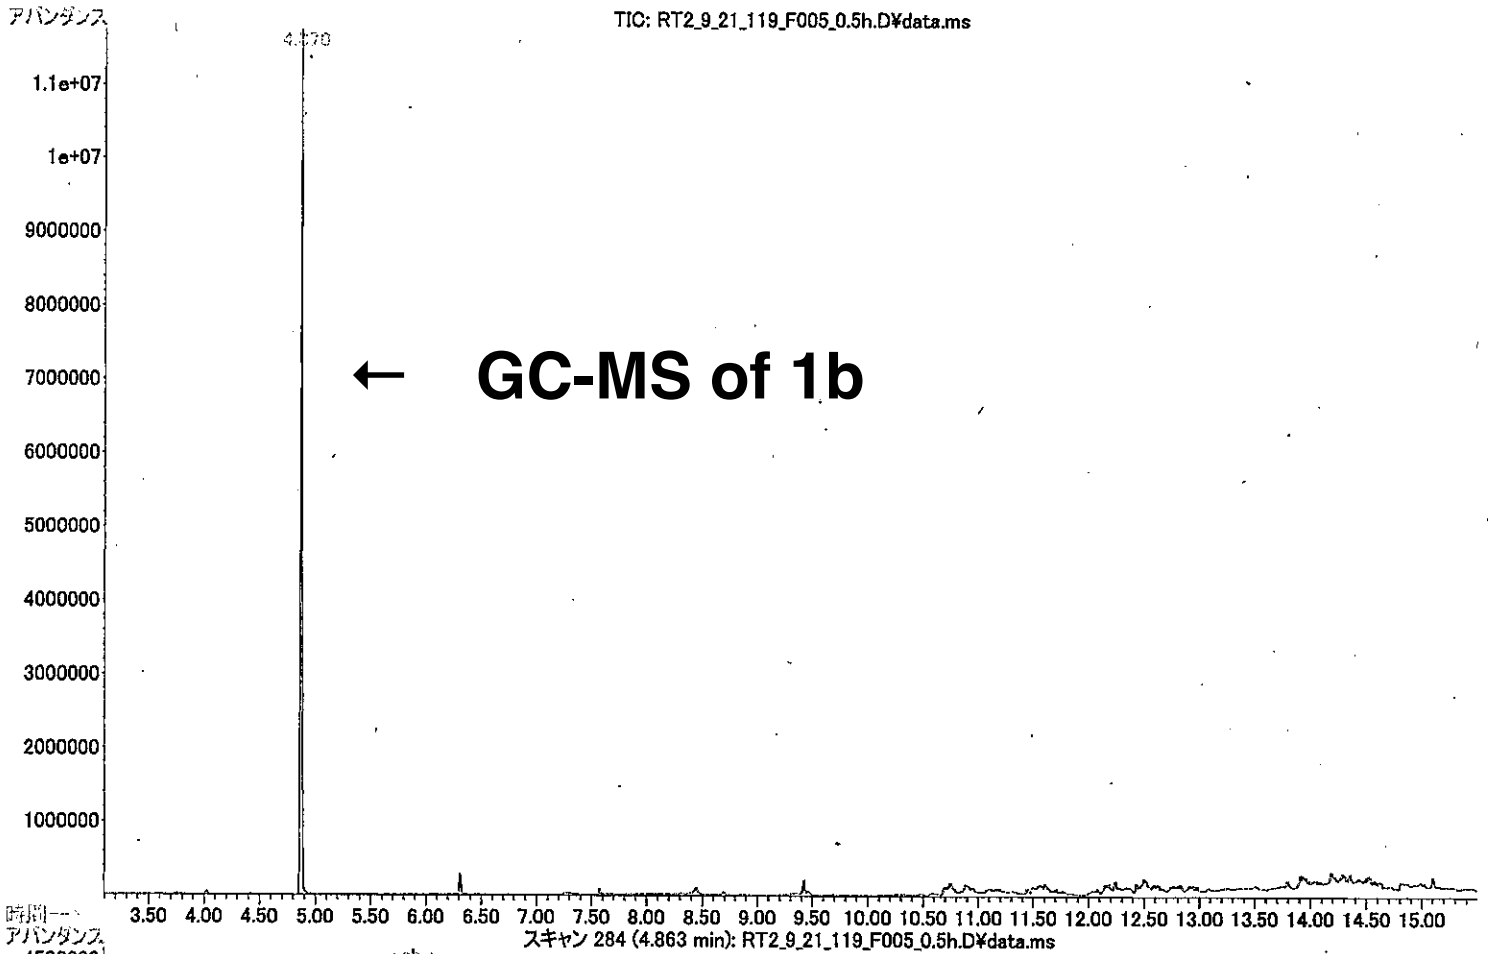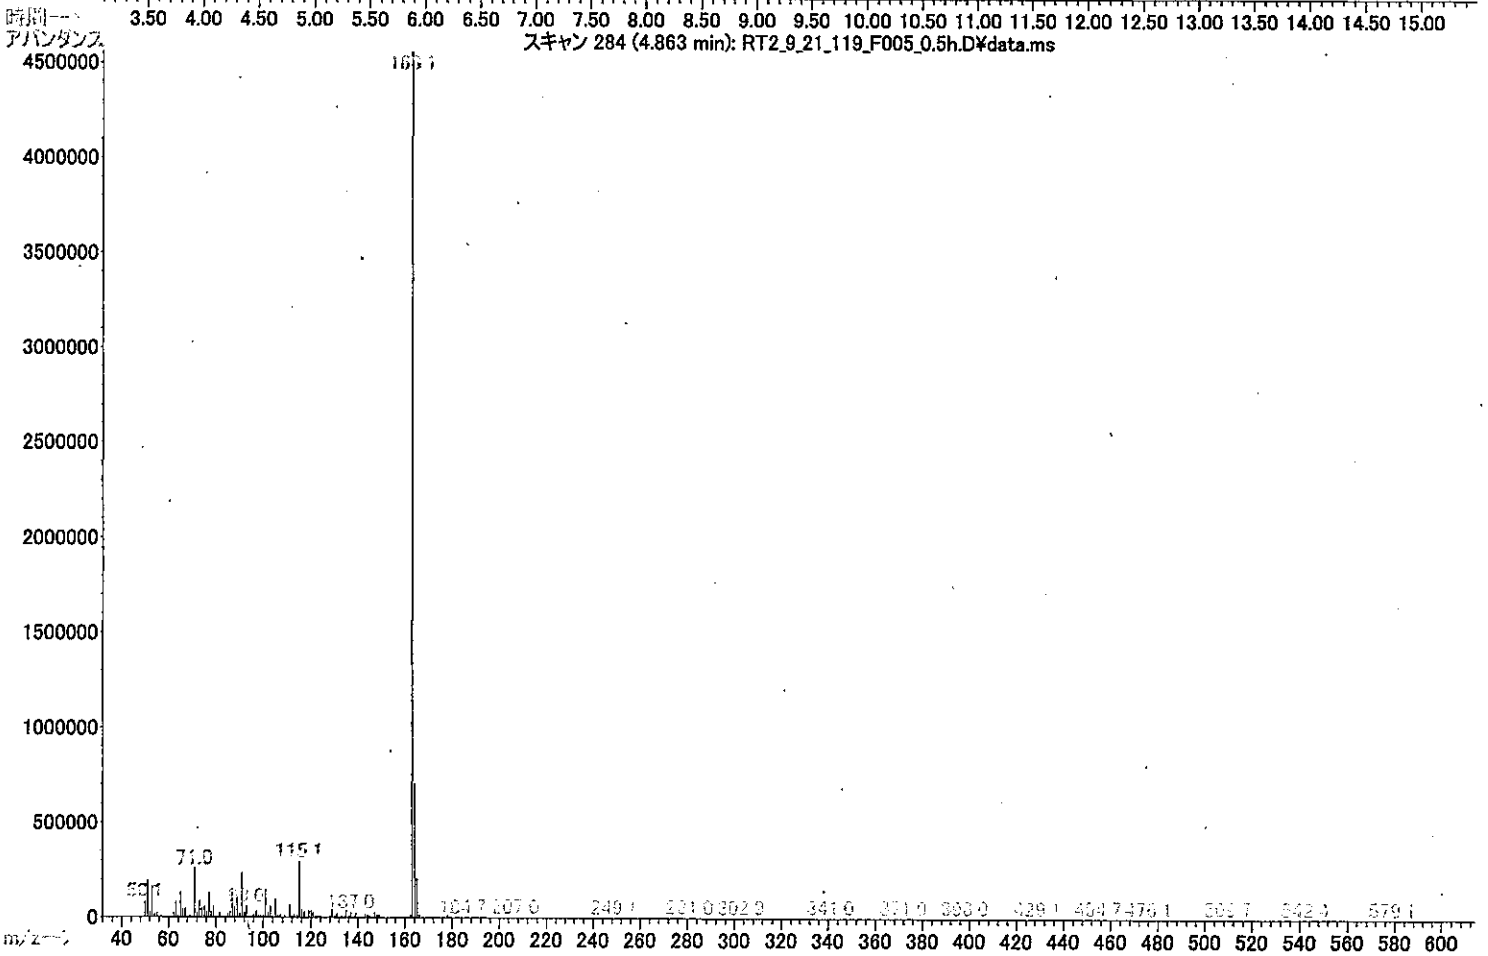

Supplement: d2ob01827f1.pdf [file d2ob01827f1.pdf]
